# Supplementary material
Source: PubMed Central journal article supplement (PMC7563669)

## Supplemental Online Content

Hayashi H, Takiguchi Y, Minami H, et al. Site-specific and targeted therapy based on molecular profiling by next-generation sequencing for cancer of unknown primary site: a nonrandomized phase 2 clinical trial. *JAMA Oncol*. Published online October 15, 2020. doi:10.1001/jamaoncol.2020.4643

### **eMethods**

**eTable 1.** Gene List for RNA Sequencing

**eTable 2.** The results of validation study about tumor classification

**eTable 3.** The example of prior probability for ERBB2 gene alteration

**eTable 4.** Details of Poststudy Cancer Therapy

**eTable 5.** Adverse Events of Any Grade in at Least 10% of Patients (n = 97)

**eFigure.** Patient Disposition

This supplemental material has been provided by the authors to give readers additional information about their work.

## eMethods

### Molecular Assay Procedures

Macrodissection of FFPE samples was performed to select a cancer region, which was marked by a pathologist after paraffin removal. DNA and RNA were extracted and purified from the samples with the use of an Allprep DNA/RNA FFPE Kit (Qiagen, Valencia, CA). The quality and quantity of the DNA and RNA were verified with a PicoGreen dsDNA Assay Kit (Life Technologies, Foster City, CA) and RiboGreen RNA Assay Kit (Life Technologies). The extracted DNA and RNA were stored at  $-80^{\circ}\text{C}$  until analysis.

For DNA sequencing, 20 ng of DNA were subjected to multiplex PCR (polymerase chain reaction) amplification with the use of an Ion AmpliSeq Library Kit 2.0 (Thermo Fisher Scientific, Waltham, MA) and Ion AmpliSeq Cancer Hotspot Panel v2 (Thermo Fisher Scientific). Construction and purification of libraries were performed as described.<sup>1</sup> Pooled libraries were sequenced with an Ion Torrent PGM instrument (Thermo Fisher Scientific) and with the use of an Ion PGM Hi-Q Chef Kit (Thermo Fisher Scientific) and Ion 316 v2 Chip Kit (Thermo Fisher Scientific). DNA sequencing data were accessed through Torrent Suite v.5.0.2 software. Reads were aligned with the hg19 human reference genome, and variants were called with the use of Variant Caller ver 5.0.2. and then processed as described previously.<sup>1-3</sup>

For RNA sequencing, PCR primers were designed with the use of Ion AmpliSeq Designer (Life Technologies). The genes subjected to RNA sequencing are listed in eTable 1. An Ion AmpliSeq RNA Library Kit (Thermo Fisher Scientific) was used for RNA library construction from 10 ng of total RNA. Pooled libraries were sequenced with an Ion Torrent PGM instrument and with the use of an Ion PGM Hi-Q Chef Kit and Ion 316 v2 Chip Kit. Relative expression (raw read number/total read number) of each gene was calculated for normalization.

### Data Analysis

On the basis of the gene expression profiles of 130 CUP patients analyzed in our previous,<sup>4</sup> we selected marker genes that were significantly expressed in CUP with predicted tissue of origin based on the classification using Bayesian posteriori probability maximization method.<sup>4</sup>

To predict the tissue of origin, we used a weighted voting algorithm, in which each weight value was calculated as the signal-to-noise ratio.<sup>5</sup> Briefly, the signal-to-noise statistic ( $S_x$ ) is calculated as  $S_x = (\mu_{\text{class0}} - \mu_{\text{class1}}) / (\sigma_{\text{class0}} + \sigma_{\text{class1}})$ , where  $\mu$  is the mean value and  $\sigma$  is the standard deviation for each class. In this scheme, the

algorithm can also be used to find the decision boundaries between the class means as  $b_x = (\mu_{\text{class0}} + \mu_{\text{class1}}) / 2$  for each gene. To predict the class of a test sample  $\gamma$ , each gene  $x$  in the predictive gene set has a vote based on the expression in this sample ( $g_x^\gamma$ ) and  $b_x$ :  $V_x = S_x (g_x^\gamma - b_x)$  and the final vote for class 0 or 1 is  $\text{sign}(\sum_x V_x)$ .

A validation test was performed to estimate the accuracy (true classification rate) of the classification procedure with the gene data about 16 cancer types from TCGA data set. RNASeqV2 data for those cancer types were downloaded from TCGA Data Portal upon request to the Data Coordinating Center (DCC). As a result, the average yielded a value of 85.0% (5,428/6389) as a validated estimate of accuracy as shown in eTable2.

We also used Bayesian inference in order to estimate the tissue of origin based on the gene alteration. The posterior probability was calculated with the following formula based on the mutation rate found in cBioPortal database.

$$P(\text{Ori} | \text{mut}) = \frac{P(\text{mut} | \text{Ori}) * P(\text{Ori})}{\sum_{\text{ori}} P(\text{mut} | \text{Ori}) * P(\text{Ori})}$$

$P(\text{mut} | \text{Ori})$  was calculated based on the number of patients with corresponding genetic alteration divided by the number of patients analyzed for each cancer type. These numbers were based on studies summarized by cBioPortal (<https://www.cbioportal.org/>), such as LUAD (n=230, TCGA, Nature 2014), Lung SCC (n=178, TCGA, Nature 2012), COAD (n=74, Genentech, Nature 2012 & n=138, MSKCC, Genome Biol 2014).<sup>6-17</sup>  $P(\text{Ori})$  was the number of new cancer cases from Cancer statistics, 2014 (<https://acsjournals.onlinelibrary.wiley.com/doi/10.3322/caac.21208>).  $P(\text{Ori} | \text{mut})$  was calculated for male and for female, respectively. The example about the calculation of prior probability for ERBB2 was shown in eTable3.

When the gene alteration was found for those genes, including *KRAS*, *EGFR*, *HER2* and *KIT*, based on the DNA sequencing result, the prior probability was applied for the patient together with the estimation based on the gene expression based on RNA-Seq profiles. Tissue from the study patients was classified with the rule, and the resulting prediction (the class with the highest posteriori probability) was reported to the treating physician.

## References

1. Takeda M, Sakai K, Terashima M, et al. Clinical application of amplicon-based next-generation sequencing to therapeutic decision making in lung cancer. *Ann Oncol*. 2015;26(12):2477-2482.
2. Sakai K, Takeda H, Nishijima N, et al. Targeted DNA and RNA sequencing of fine-needle biopsy FFPE specimens in patients with unresectable hepatocellular carcinoma treated with sorafenib. *Oncotarget*. 2015;6(25):21636-21644.
3. Takeda M, Sakai K, Okamoto K, et al. Genome sequencing for nonsmall-cell lung cancer identifies a basis for nintedanib sensitivity. *Ann Oncol*. 2016;27(4):748-750.
4. Hayashi H, Kurata T, Takiguchi Y, et al. Randomized Phase II Trial Comparing Site-Specific Treatment Based on Gene Expression Profiling With Carboplatin and Paclitaxel for Patients With Cancer of Unknown Primary Site. *J Clin Oncol*. 2019;37(7):570-579.
5. Yanagisawa K, Tomida S, Shimada Y, Yatabe Y, Mitsudomi T, Takahashi T. A 25-signal proteomic signature and outcome for patients with resected non-small-cell lung cancer. *J Natl Cancer Inst*. 2007;99(11):858-867.
6. Cancer Genome Atlas Research N. Comprehensive molecular characterization of urothelial bladder carcinoma. *Nature*. 2014;507(7492):315-322.
7. Cancer Genome Atlas N. Comprehensive molecular portraits of human breast tumours. *Nature*. 2012;490(7418):61-70.
8. Cancer Genome Atlas N. Comprehensive molecular characterization of human colon and rectal cancer. *Nature*. 2012;487(7407):330-337.
9. Cancer Genome Atlas Research N. Comprehensive molecular characterization of clear cell renal cell carcinoma. *Nature*. 2013;499(7456):43-49.
10. Schulze K, Imbeaud S, Letouze E, et al. Exome sequencing of hepatocellular carcinomas identifies new mutational signatures and potential therapeutic targets. *Nat Genet*. 2015;47(5):505-511.
11. Cancer Genome Atlas Research N. Comprehensive molecular profiling of lung adenocarcinoma. *Nature*. 2014;511(7511):543-550.
12. Cancer Genome Atlas Research N. Integrated genomic analyses of ovarian carcinoma. *Nature*. 2011;474(7353):609-615.
13. Biankin AV, Waddell N, Kassahn KS, et al. Pancreatic cancer genomes reveal aberrations in axon guidance pathway genes. *Nature*. 2012;491(7424):399-405.
14. Cancer Genome Atlas Research N. The Molecular Taxonomy of Primary Prostate Cancer. *Cell*. 2015;163(4):1011-1025.

15. Cancer Genome Atlas Research N. Comprehensive molecular characterization of gastric adenocarcinoma. *Nature*. 2014;513(7517):202-209.
16. Cancer Genome Atlas N. Comprehensive genomic characterization of head and neck squamous cell carcinomas. *Nature*. 2015;517(7536):576-582.
17. Cancer Genome Atlas Research N. Comprehensive genomic characterization of squamous cell lung cancers. *Nature*. 2012;489(7417):519-525.

**eTable1. Gene List for RNA Sequencing**

|                  |                 |                   |                  |                  |                 |
|------------------|-----------------|-------------------|------------------|------------------|-----------------|
| GENE_ID=DHRS2    | GENE_ID=ORM1    | GENE_ID=ADAP1     | GENE_ID=FGF19    | GENE_ID=OMD      | GENE_ID=TG      |
| GENE_ID=KRT17    | GENE_ID=NAPSA   | GENE_ID=ADCY2     | GENE_ID=FGF3     | GENE_ID=OR51E2   | GENE_ID=TIMM8A  |
| GENE_ID=KRT7     | GENE_ID=NKX2-1  | GENE_ID=ADIPOQ    | GENE_ID=FGF9     | GENE_ID=PAEP     | GENE_ID=TIMP4   |
| GENE_ID=S100A2   | GENE_ID=SCGB1A1 | GENE_ID=ADRA1B    | GENE_ID=FKBP11   | GENE_ID=PAPOLG   | GENE_ID=TMPRSS3 |
| GENE_ID=SDC1     | GENE_ID=SFTPA2  | GENE_ID=AKAP6     | GENE_ID=FOLH1    | GENE_ID=PART1    | GENE_ID=TPO     |
| GENE_ID=UPK3A    | GENE_ID=SFTPB   | GENE_ID=AMD1      | GENE_ID=FOLH1B   | GENE_ID=PAX4     | GENE_ID=TRAFD1  |
| GENE_ID=EFHD1    | GENE_ID=SFTPC   | GENE_ID=ARHGAP6   | GENE_ID=G6PC     | GENE_ID=PCNXL2   | GENE_ID=TRIM9   |
| GENE_ID=ERBB2    | GENE_ID=LRMP    | GENE_ID=ASTN2     | GENE_ID=GAL3ST1  | GENE_ID=PDLIM5   | GENE_ID=TRPM8   |
| GENE_ID=ESR1     | GENE_ID=MS4A1   | GENE_ID=ATP10B    | GENE_ID=GAP43    | GENE_ID=PDZK1    | GENE_ID=TRPV6   |
| GENE_ID=GATA3    | GENE_ID=PAX8    | GENE_ID=ATP2C1    | GENE_ID=GATA2    | GENE_ID=PGM3     | GENE_ID=TSHR    |
| GENE_ID=MUCL1    | GENE_ID=RGS13   | GENE_ID=ATP6V1G2  | GENE_ID=GFAP     | GENE_ID=PHF1     | GENE_ID=TTR     |
| GENE_ID=PIP      | GENE_ID=EMX2    | GENE_ID=BAALC     | GENE_ID=GJB5     | GENE_ID=PLEK2    | GENE_ID=TTTY14  |
| GENE_ID=SERPINB4 | GENE_ID=FBXO21  | GENE_ID=BAAT      | GENE_ID=GPM6A    | GENE_ID=PLIN1    | GENE_ID=TXNL4A  |
| GENE_ID=CDH17    | GENE_ID=FOLR1   | GENE_ID=BCAN      | GENE_ID=GPM6B    | GENE_ID=PLP1     | GENE_ID=VIL1    |
| GENE_ID=CDX1     | GENE_ID=KLHDC8A | GENE_ID=BHMT      | GENE_ID=GPR135   | GENE_ID=PMF1     | GENE_ID=ZC3HAV1 |
| GENE_ID=CDX2     | GENE_ID=KLK8    | GENE_ID=BP1FA1    | GENE_ID=GPX2     | GENE_ID=PMP2     | GENE_ID=ZNF365  |
| GENE_ID=CEACAM5  | GENE_ID=MEIS1   | GENE_ID=C10orf57  | GENE_ID=GRIA3    | GENE_ID=PRR15L   | GENE_ID=ZNF395  |
| GENE_ID=EPS8L3   | GENE_ID=WT1     | GENE_ID=C14orf105 | GENE_ID=HBD      | GENE_ID=PRR4     |                 |
| GENE_ID=GUCA2A   | GENE_ID=CELA3A  | GENE_ID=C19orf21  | GENE_ID=HNF1B    | GENE_ID=RAB3B    |                 |
| GENE_ID=KRT20    | GENE_ID=CLPS    | GENE_ID=C1orf61   | GENE_ID=HOXB13   | GENE_ID=RDH11    |                 |
| GENE_ID=LGALS4   | GENE_ID=CPA1    | GENE_ID=C2        | GENE_ID=HS3ST3A1 | GENE_ID=RNF43    |                 |
| GENE_ID=PIGR     | GENE_ID=CPA2    | GENE_ID=C7orf63   | GENE_ID=HSD3B2   | GENE_ID=RUFY3    |                 |
| GENE_ID=SLC26A3  | GENE_ID=CPB1    | GENE_ID=CALB2     | GENE_ID=IBSP     | GENE_ID=RUNX1    |                 |
| GENE_ID=TMPRSS4  | GENE_ID=CTRB2   | GENE_ID=CDH6      | GENE_ID=KANSL1L  | GENE_ID=RUNX2    |                 |
| GENE_ID=CAPN14   | GENE_ID=GCG     | GENE_ID=CDK18     | GENE_ID=KCND2    | GENE_ID=SATB2    |                 |
| GENE_ID=GJB6     | GENE_ID=GP2     | GENE_ID=CDK19     | GENE_ID=KCNJ16   | GENE_ID=SCN1A    |                 |
| GENE_ID=KRT4     | GENE_ID=PRSS1   | GENE_ID=CEACAM1   | GENE_ID=KCNN2    | GENE_ID=SERPINB3 |                 |
| GENE_ID=LY6K     | GENE_ID=REG1A   | GENE_ID=CHGB      | GENE_ID=LPHN3    | GENE_ID=SFRP2    |                 |
| GENE_ID=DAPK1    | GENE_ID=REG1B   | GENE_ID=CKM       | GENE_ID=LPP      | GENE_ID=SFTPD    |                 |
| GENE_ID=LRP2     | GENE_ID=CELA3B  | GENE_ID=COL10A1   | GENE_ID=MALT1    | GENE_ID=SIM2     |                 |
| GENE_ID=MYBPC1   | GENE_ID=ACPP    | GENE_ID=CTNND2    | GENE_ID=MAP4K2   | GENE_ID=SLC16A4  |                 |
| GENE_ID=HEPH     | GENE_ID=KLK2    | GENE_ID=CUL3      | GENE_ID=MAU2     | GENE_ID=SLC17A1  |                 |
| GENE_ID=MT3      | GENE_ID=KLK3    | GENE_ID=CWH43     | GENE_ID=MB       | GENE_ID=SLC17A3  |                 |
| GENE_ID=TKTL1    | GENE_ID=COMP    | GENE_ID=DCLK2     | GENE_ID=MIA3     | GENE_ID=SLC22A2  |                 |
| GENE_ID=KRT14    | GENE_ID=FBN1    | GENE_ID=DLK1      | GENE_ID=MLC1     | GENE_ID=SLC25A37 |                 |
| GENE_ID=KRT6B    | GENE_ID=DSG3    | GENE_ID=DLL3      | GENE_ID=MMP13    | GENE_ID=SLC30A4  |                 |
| GENE_ID=S100A7   | GENE_ID=GBP6    | GENE_ID=DNAJB12   | GENE_ID=MRPS18C  | GENE_ID=SLC3A1   |                 |
| GENE_ID=SPRR1A   | GENE_ID=KRT5    | GENE_ID=DTNA      | GENE_ID=MS4A3    | GENE_ID=SLC44A1  |                 |
| GENE_ID=CDH16    | GENE_ID=KRT6A   | GENE_ID=EGLN3     | GENE_ID=MSMB     | GENE_ID=SORD     |                 |
| GENE_ID=FXYD2    | GENE_ID=SPRR1B  | GENE_ID=ELAC2     | GENE_ID=MYH2     | GENE_ID=SOX2     |                 |
| GENE_ID=NAT8     | GENE_ID=SPRR3   | GENE_ID=ENO3      | GENE_ID=MYO1D    | GENE_ID=SPAG8    |                 |
| GENE_ID=APOC3    | GENE_ID=CTSE    | GENE_ID=ENPEP     | GENE_ID=NCAN     | GENE_ID=SPDEF    |                 |
| GENE_ID=C6       | GENE_ID=GKN1    | GENE_ID=ENPP1     | GENE_ID=NOVA1    | GENE_ID=SPRY4    |                 |
| GENE_ID=CRP      | GENE_ID=LIPF    | GENE_ID=ESM1      | GENE_ID=NPDC1    | GENE_ID=ST8SIA3  |                 |
| GENE_ID=FGA      | GENE_ID=PGC     | GENE_ID=FAM120A   | GENE_ID=NPY      | GENE_ID=STMN4    |                 |
| GENE_ID=FGB      | GENE_ID=SPINK1  | GENE_ID=FAM66D    | GENE_ID=NPY2R    | GENE_ID=TCL6     |                 |
| GENE_ID=FGG      | GENE_ID=TFF1    | GENE_ID=FBXL8     | GENE_ID=NR1H4    | GENE_ID=TEF      |                 |
| GENE_ID=HP       | GENE_ID=TFF2    | GENE_ID=FERMT1    | GENE_ID=OAZ3     | GENE_ID=TFF3     |                 |

**eTable2: The results of validation study about tumor classification.**

| ID     | BLCA | BRCA | COAD | KDNY | LIHC | LUAD | OV  | PAAD | PRAD | DLBCL | Germ | SARC | SC_all | CESC | HNSC | LUSC |
|--------|------|------|------|------|------|------|-----|------|------|-------|------|------|--------|------|------|------|
| BLCA   | 217  | 42   | 0    | 4    | 0    | 1    | 0   | 2    | 0    | 0     | 2    | 12   | 9      | 7    | 2    | 0    |
| BRCA   | 3    | 964  | 0    | 0    | 0    | 1    | 0   | 0    | 7    | 0     | 0    | 3    | 16     | 7    | 9    | 0    |
| COAD   | 11   | 3    | 496  | 0    | 1    | 2    | 0   | 3    | 0    | 0     | 26   | 4    | 10     | 9    | 0    | 1    |
| KDNY   | 0    | 0    | 0    | 854  | 2    | 0    | 1   | 0    | 0    | 0     | 2    | 1    | 15     | 14   | 0    | 1    |
| LIHC   | 0    | 8    | 0    | 11   | 311  | 19   | 0   | 0    | 0    | 0     | 9    | 1    | 2      | 0    | 0    | 2    |
| LUAD   | 4    | 1    | 0    | 0    | 0    | 503  | 1   | 0    | 0    | 0     | 2    | 3    | 141    | 6    | 0    | 135  |
| OV     | 3    | 6    | 0    | 2    | 1    | 1    | 197 | 1    | 0    | 0     | 2    | 46   | 19     | 15   | 1    | 3    |
| PAAD   | 0    | 14   | 2    | 0    | 1    | 1    | 1   | 103  | 0    | 0     | 6    | 17   | 3      | 2    | 0    | 1    |
| PRAD   | 1    | 0    | 0    | 0    | 0    | 0    | 0   | 0    | 461  | 0     | 0    | 0    | 0      | 0    | 0    | 0    |
| DLBCL  | 8    | 32   | 0    | 1    | 1    | 2    | 0   | 4    | 0    | 46    | 5    | 8    | 6      | 1    | 1    | 4    |
| Germ   | 14   | 9    | 4    | 1    | 2    | 13   | 60  | 1    | 0    | 1     | 97   | 15   | 60     | 12   | 16   | 32   |
| SARC   | 7    | 42   | 1    | 3    | 0    | 0    | 0   | 3    | 0    | 0     | 0    | 93   | 5      | 2    | 3    | 0    |
| SC_all | 79   | 39   | 1    | 0    | 0    | 3    | 0   | 0    | 0    | 0     | 3    | 1    | 1086   | 173  | 507  | 406  |
| NA     | 0    | 1    | 0    | 1    | 0    | 0    | 0   | 0    | 0    | 0     | 2    | 11   | 0      | 0    | 0    | 0    |
| total  | 347  | 1161 | 504  | 877  | 319  | 546  | 260 | 117  | 468  | 47    | 156  | 215  | 1372   | 248  | 539  | 585  |
| ID     | BLCA | BRCA | COAD | KDNY | LIHC | LUAD | OV  | PAAD | PRAD | DLBCL | Germ | SARC | SC_all | CESC | HNSC | LUSC |
| CESC   | 66   | 7    | 0    | 0    | 0    | 1    | 0   | 1    | 0    | 0     | 0    | 0    | 259    | 143  | 89   | 27   |
| HNSC   | 30   | 43   | 1    | 0    | 0    | 0    | 0   | 0    | 0    | 0     | 0    | 1    | 501    | 29   | 414  | 58   |
| LUSC   | 1    | 0    | 0    | 0    | 0    | 11   | 0   | 0    | 0    | 0     | 0    | 0    | 277    | 0    | 4    | 273  |
| NA     | 0    | 8    | 0    | 0    | 0    | 0    | 0   | 0    | 0    | 0     | 0    | 0    | 1      | 1    | 0    | 0    |

Each column corresponds to the cancer type being analyzed, and each row represents the number of cases for each cancer type as estimated cancer of origin.

In the case of BRCA, 964 out of 1161 samples (83%) were correctly predicted as samples with breast cancer.

**eTable3: The example of prior probability for *ERBB2* gene alteration**

| ID   | Origin    | Sample no. | Mut. no. | ①<br>$P(\text{mut} \text{ori})^1$ | ②: male<br>$P_m(\text{ori})^2$ | ①×②    | ③: female<br>$P_f(\text{ori})^3$ | ①×③    | $P_m(\text{ori} \text{mut})$ | $P_f(\text{ori} \text{mut})$ |
|------|-----------|------------|----------|-----------------------------------|--------------------------------|--------|----------------------------------|--------|------------------------------|------------------------------|
| BLCA | Bladder   | 127        | 4        | 3.1%                              | 56,390                         | 1,776  | 18,300                           | 576    | 15%                          | 2%                           |
| BRCA | Breast    | 482        | 65       | 13.5%                             | 2,360                          | 318    | 232,670                          | 31,377 | 3%                           | <b>83%</b>                   |
| COAD | Colon     | 212        | 5        | 2.4%                              | 48,450                         | 1,143  | 48,380                           | 1,141  | 10%                          | 3%                           |
| KIRC | Kidney    | 415        | 0        | 0.3%                              | 39,140                         | 116    | 24,780                           | 74     | 1%                           | 0%                           |
| LIHC | Liver     | 196        | 1        | 0.5%                              | 24,600                         | 126    | 8,590                            | 44     | 1%                           | 0%                           |
| LUAD | Lung      | 230        | 6        | 2.6%                              | 46,400                         | 1,210  | 43,284                           | 1,129  | 10%                          | 3%                           |
| OV   | Ovarian   | 316        | 4        | 1.3%                              | NA                             | NA     | 21,980                           | 278    | NA                           | 1%                           |
| PAAD | Panc      | 90         | 1        | 1.1%                              | 23,530                         | 261    | 22,890                           | 254    | 2%                           | 1%                           |
| PRAD | Prostate  | 302        | 3        | 1.0%                              | 233,000                        | 2,315  | NA                               | NA     | 20%                          | NA                           |
| STAD | Stomach   | 287        | 36       | 12.5%                             | 13,730                         | 1,722  | 8,490                            | 1,065  | 15%                          | 3%                           |
| LMH  | Lymphoma  | 48         | 0        | 0.0%                              | 38,270                         | 0      | 32,530                           | 0      | 0%                           | 0%                           |
| GERM | Germ cell | 156        | 0        | 0.0%                              | 8,820                          | 0      |                                  |        | 0%                           |                              |
| SARC | Sarcoma   | 1484       | 0        | 0.0%                              | 6,550                          | 0      | 5,470                            | 0      | 0%                           | 0%                           |
| CE   | Cervical  | 36         | 2        | 5.6%                              | NA                             | NA     | 12,360                           | 687    | NA                           | 2%                           |
| ESO  | Eso       | 126        | 15       | 11.9%                             | 14,660                         | 1,745  | 3,510                            | 418    | 15%                          | 1%                           |
| HN   | Head_Neck | 302        | 9        | 3.0%                              |                                | 0      |                                  | 0      | 0%                           | 0%                           |
| LUSC | Lung      | 178        | 5        | 2.8%                              | 29,000                         | 815    | 27,053                           | 760    | 7%                           | 2%                           |
|      | Total     |            |          |                                   | 584,900                        | 11,548 | 510,287                          | 37,803 | 100%                         | 100%                         |



**eTable4. Details of Poststudy Cancer Therapy**

|                                                        | Site-Specific Therapy<br>( <i>n</i> = 97) |
|--------------------------------------------------------|-------------------------------------------|
| Subsequent radiotherapy, <i>n</i> (%)                  | 20 (20.6%)                                |
| Subsequent systemic therapy, <sup>a</sup> <i>n</i> (%) | 56 (57.7%) <sup>b</sup>                   |
| Chemotherapy                                           |                                           |
| Platinum agent                                         | 26 (26.8%)                                |
| Taxane                                                 | 25 (25.8%) <sup>c</sup>                   |
| Gemcitabine                                            | 14 (14.4%)                                |
| 5-Fluorouracil                                         | 11 (11.3%)                                |
| Anthracycline                                          | 5 (5.2%)                                  |
| Topoisomerase inhibitor                                | 11 (11.3%)                                |
| Vinca alkaloid                                         | 2 (2.1%)                                  |
| Other <sup>c</sup>                                     | 9 (9.3%)                                  |
| Molecularly targeted agents                            |                                           |
| VEGF inhibitor                                         | 8 (8.2%)                                  |
| EGFR-TKI                                               | 1 (1.0%)                                  |
| Endocrine therapy                                      | 1 (1.0%)                                  |
| Immunotherapy                                          | 8 (8.2%)                                  |
| Experimental therapy                                   | 4 (4.1%)                                  |

<sup>a</sup>Patients may have received more than one type of subsequent therapy.

<sup>b</sup>Number of patients who received at least one line of systemic therapy.

<sup>c</sup>Includes eribulin, trifluridine/tipiracil, cyclophosphamide, pemetrexed, and trabectedin.

Abbreviations: VEGF, vascular endothelial growth factor; EGFR-TKI, epidermal growth factor receptor–tyrosine kinase inhibitor.

**eTable 5. Adverse Events of Any Grade in at Least 10% of Patients (n = 97)**

| Adverse Event         | All Grades |      | Grade $\geq 3$ |      |
|-----------------------|------------|------|----------------|------|
|                       | No.        | %    | No.            | %    |
| <i>Nonhematologic</i> |            |      |                |      |
| AST increased         | 48         | 49.5 | 6              | 6.2  |
| Anorexia              | 46         | 47.4 | 7              | 7.2  |
| ALT increased         | 43         | 44.3 | 6              | 6.2  |
| Nausea                | 41         | 42.3 | 6              | 6.2  |
| Fatigue               | 36         | 37.1 | 5              | 5.2  |
| Constipation          | 29         | 29.9 | 0              | 0    |
| Creatinine increased  | 25         | 25.8 | 1              | 1.0  |
| Sensory neuropathy    | 24         | 24.7 | 1              | 1.0  |
| Fever                 | 21         | 21.6 | 1              | 1.0  |
| Diarrhea              | 19         | 19.6 | 4              | 4.1  |
| Alopecia              | 19         | 19.6 | 1              | 1.0  |
| <i>Hematologic</i>    |            |      |                |      |
| WBC decreased         | 53         | 54.6 | 21             | 21.6 |
| Neutrophil decreased  | 58         | 59.8 | 27             | 27.8 |
| Thrombocytopenia      | 63         | 64.9 | 11             | 11.3 |
| Anemia                | 62         | 63.9 | 15             | 15.5 |

Adverse events are defined according to MedDRA preferred terms. Abbreviations: AST, aspartate aminotransferase; ALT, alanine aminotransferase; WBC, white blood cell.

**eFigure1. Patient Disposition**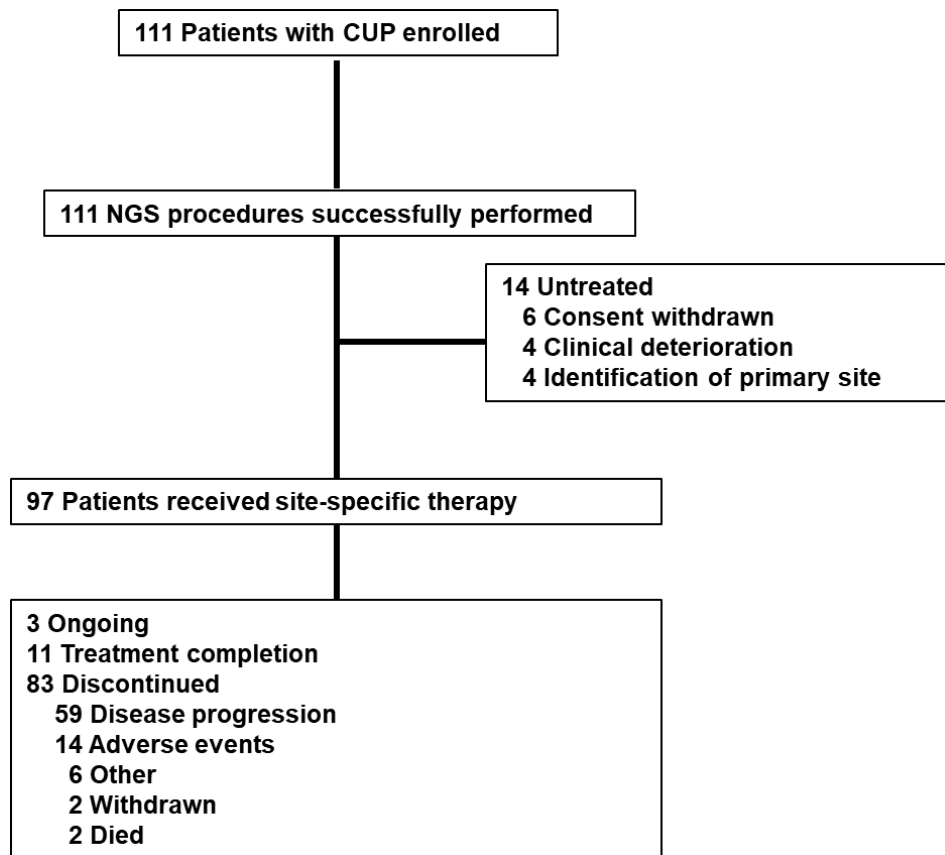

Supplement: jamaoncol-e204643-s002.pdf [file jamaoncol-e204643-s002.pdf]
