# Supplementary material
Source: PubMed Central journal article supplement (PMC7563669)
Supplement: jamaoncol-e204643-s001.pdf [file jamaoncol-e204643-s001.pdf]

1  
2  
3 **Phase II trial of treatment based on gene profiling diagnosis using next**  
4 **generation sequencing for carcinoma of unknown primary site**

5  
6 **Clinical Study Protocol**  
7

8 **Study Chair**

9 **Group Chair** : Kazuhiko Nakagawa

10 Department of Medical Oncology, Faculty of Medicine, Kindai University

11 377-2 Ohno-higashi Sasayama-shi Osaka, Japan, 589-8511

12 TEL : 072-366-0221 FAX : 072-360-5000  
13  
14

15 **Study Coordinator**

16 Hidetoshi Hayashi

17 Department of Medical Oncology, Faculty of Medicine, Kindai University

18 377-2 Ohno-higashi Sasayama-shi Osaka, Japan, 589-8511

19 Tel: +81-72-366-0221 Fax: +81-72-360-5000

20 E-mail: hidet31@gmail.com  
21

22 **Registration Office**

23 WJOG Data Center

24 304 Nanba Plaza Buiding 3F. 1-5-7 Motomachi Naniwaku Osaka-shi, Osaka 556-0016

25 Tel:+81-6-6633-7400 Fax:+81-6-6633-7405

26 E-mail : datacenter@wjog.jp  
27

28 Protocol concept approved on December 8, 2014

29 Revision to ver1.1 approved on January 25, 2015

30 Revision to ver1.2 approved on February 24, 2014

31 Revision to ver1.21 approved on August 10, 2015

32 Revision to ver2.0 approved on December 18, 2015

33 Revision to ver3.0 approved on February 7, 2017  
34

35 Revision to ver3.1 approved on May 5, 2017

36 Revision to ver3.2 approved on December 14, 2018  
37  
38

39 **1. Outline of the protocol**

40 **1.1. Schema of this study**

41

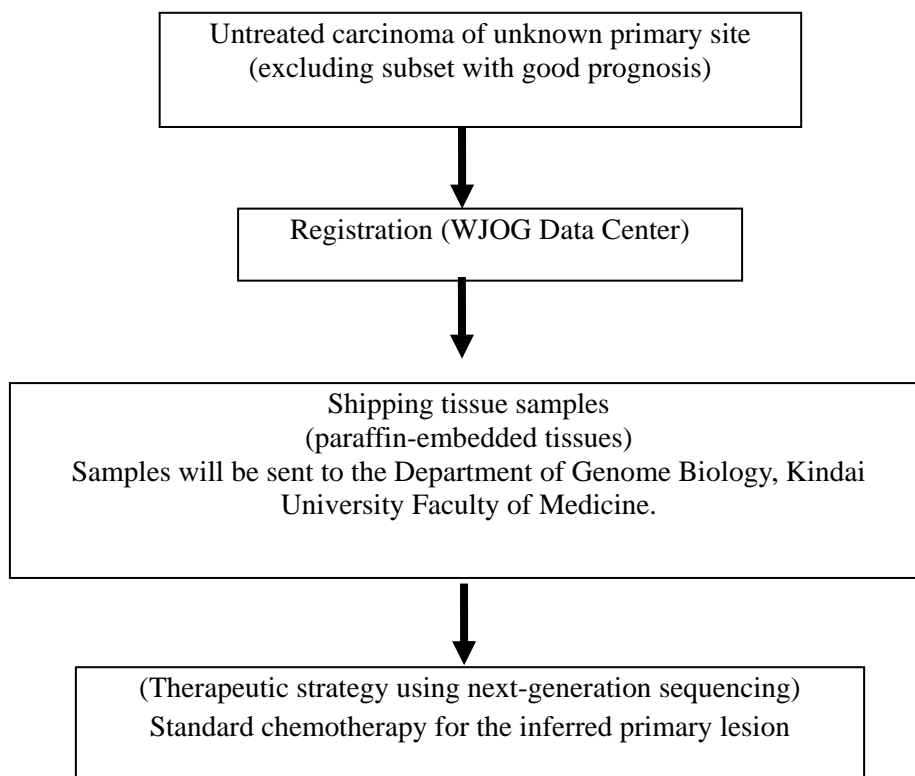

42

43

44

45

46

47

48

49 again.

50

51 **1.2. Study type**

52 Multicenter phase II clinical study using a central registration system

53

54 **1.3. Purpose of the study**

55 To examine whether the use of next-generation sequencing (NGS) to infer the  
56 primary site is useful in patients with previously untreated carcinoma of  
57 unknown primary site in a phase II study

58

59 Primary endpoint: 1-year survival rate

60 Secondary endpoints: Overall survival, progression-free survival, antitumor effect,  
61 safety, the relationship between the inferred primary site and therapeutic effect  
62 (exploratory investigation), and the frequency of gene mutations/amplifications in  
63 carcinoma of unknown primary site

64

65 **1.4. Target number of cases and study period**

66 Target number of cases: 110

67 Study period: March 2015 to February 2020 (3 years, 1 year, and 1 year for  
68 registration, follow-up, and analysis, respectively)

69

70

71 **1.5. Subjects**

72 Patients with untreated carcinoma of unknown primary site

73  
74  
75  
76  
77  
78  
79  
80  
81  
82  
83  
84  
85  
86  
87  
88  
89  
90  
91

## 1.6. Patient inclusion and exclusion criteria

### 1.6.1. Inclusion criteria

Eligible patients should satisfy all of the following conditions.

- (1) Epithelial carcinoma of unknown primary site with histologically confirmed metastatic tumors (Any patients histologically diagnosed with malignant melanoma, malignant lymphoma, or sarcoma should be excluded, and the investigator should do the utmost to exclude patients with these conditions.)
- (2) Chemotherapy-naïve patients (However, patients who received chemotherapy for malignant tumors cured more than 5 years previously may be enrolled.)
- (3) Patients from whom a pre-treatment tumor tissue can be obtained as a paraffin-embedded tissue
- (4) Patients aged 20 years or older (as of the date of informed consent)
- (5) Patients with an ECOG performance status (PS) of 0 to 2
- (6) Patients with no major organ damage (bone marrow, heart, lungs, liver, kidneys) and laboratory test values at the time of treatment initiation satisfying the following criteria (based on data within 14 days before enrollment; the study enrollment date is counted as Day 1, and the same day of the week two weeks prior is acceptable.)

|                           |                            |
|---------------------------|----------------------------|
| Hemoglobin                | $\geq 9.0$ g/dL            |
| White blood cell count    | $\geq 4,000/\text{mm}^3$   |
| Platelet count            | $\geq 100,000/\text{mm}^3$ |
| GOT and GPT (AST and ALT) | $\leq 100$ IU/L            |
| Total bilirubin           | $\leq 1.5$ mg/dL           |
| Serum creatinine          | $\leq 1.5$ mg/dL           |

- (7) Patients who were fully informed of the study content and voluntarily provided written consent prior to the start of the study

92  
93  
94  
95  
96  
97  
98  
99  
100  
101  
102  
103  
104  
105  
106  
107  
108  
109  
110  
111  
112  
113  
114  
115  
116  
117

### 1.6.2. Exclusion criteria

- (1) Patients for whom radical surgery or definitive radiation therapy is indicated
- (2) Patients receiving palliative radiation therapy for bone and brain metastases except the primary lesion. However, patients with a 2-week interval between irradiation and the initiation of study treatment may be enrolled.
- (3) A certain population of patients with carcinoma of unknown primary site have a good prognosis, and a standard treatment modality has been established for such patients. Therefore, the following patients will be excluded from this study.
  - [1] Adenocarcinoma of unknown primary site in women with axillary adenopathy alone (Treated similarly to breast cancer)
  - [2] Adenocarcinoma in women with peritoneal dissemination (ascites) alone (Treated similarly to ovarian cancer)
  - [3] Squamous cell carcinoma with cervical lymphadenopathy alone (Treated similarly to head and neck cancer)
  - [4] Squamous cell carcinoma with inguinal lymphadenopathy alone (Excision)
  - [5] Patients with features of germ cell neoplasms or neuroendocrine tumors
  - [6] A high PSA level as a serum/intratumor tumor marker in men with sclerotic bone metastases alone (Treated similarly to prostate cancer)
- (4) Patients with active, serious infections
- (5) Patients with symptomatic brain metastases. Patients requiring antiedema drugs such as steroids for symptom control. (However, patients with clinically stable, asymptomatic, known brain metastases that do not require treatment may be enrolled.)
- (6) Patients with interstitial pneumonia or pulmonary fibrosis evident on chest x-ray

- 118 (7) Patients with a history of bone marrow transplantation or peripheral blood stem cell  
119 transplantation  
120 (8) Patients with poorly controlled diabetes  
121 (9) Patients with a history of clinically significant serious drug allergy  
122 (10) HBs antigen-positive patients  
123 (11) Patients receiving continuous systemic administration of steroids or other  
124 immunosuppressant drugs (orally or intravenously)  
125 (12) Patients with mental disorder or psychiatric symptoms who are assumed to have  
126 difficulty participating in the study  
127 (13) Pregnant women, lactating women, patients who may be pregnant, and patients who  
128 wish to become pregnant  
129 (14) Patients with unstable angina (angina that has developed or has worsened in the last 3  
130 weeks) or a history of myocardial infarction within 6 months  
131 (15) Patients with poorly controlled hypertension  
132 (16) Patients with active gastrointestinal hemorrhage  
133 (17) Patients with active double cancer  
134 Note: Double cancer is defined as synchronous multiple cancers and metachronous multiple  
135 cancers with a disease-free interval of 5 years or less. Carcinoma in situ or lesions  
136 equivalent to intramucosal carcinoma that are considered cured by local treatment are not  
137 included in active double cancer.  
138 (18) Patients with reproductive potential who are not willing to use contraception during the  
139 study  
140 (19) Other patients deemed inappropriate by the investigator or subinvestigator  
141

## 142 **1.7. Dosing regimen**

143 1.7.1 The primary site will be inferred by using NGS. Based on the inference, treatment will be  
144 provided with a regimen that is considered standard. Examples are shown below for reference.  
145 The standard treatment for the primary lesion should also be employed in second-line  
146 chemotherapy after disease progression whenever possible.  
147

148 Examples for reference

- 149 (1) Non-small cell lung cancer as inferred by using NGS:

150 Histological type: Squamous cell carcinoma

151 Carboplatin plus paclitaxel therapy

152 Carboplatin AUC 6 and paclitaxel 200 mg/m<sup>2</sup>, both on Day 1, every 3 weeks  
153

154 Histological type: Non-squamous cell carcinoma (adenocarcinoma, large cell  
155 carcinoma)

156 Cisplatin plus pemetrexed therapy

157 Cisplatin 75 mg/m<sup>2</sup> and pemetrexed 500 mg/m<sup>2</sup>, both on Day 1, every 3 weeks

158 Premedication with vitamin B12 and folic acid preparation should be administered.

159 Additionally, bevacizumab 15 mg/kg on Day 1 every 3 weeks should be considered if  
160 possible in non-squamous cell carcinoma.  
161

162 EGFR mutation-positive:

163 Gefitinib: 250 mg once daily, or

164 Erlotinib: 150 mg once daily, or

165 Afatinib: 40 mg once daily  
166

- 167 (2) Gastric cancer as inferred by using NGS:

168 Cisplatin plus S-1 therapy

169 Cisplatin 60 mg/m<sup>2</sup> on Day 8 and S-1 80 mg/m<sup>2</sup> on Days 1-21, every 5 weeks  
170 HER2-positive patients (If NGS analysis suggests HER2 amplification, it is  
171 recommended to verify the results based on immunohistochemistry [IHC] or  
172 fluorescence in situ hybridization [FISH] in line with the routine practice of the study  
173 site.)  
174 Cisplatin plus capecitabine plus trastuzumab therapy  
175 Cisplatin 80 mg/m<sup>2</sup> on Day 1, capecitabine 2,000 mg/m<sup>2</sup> on Days 1-14, and trastuzumab  
176 6 mg/kg on Day 1 (8 mg/kg for the first dose)  
177  
178 (3) Colorectal cancer as inferred by using NGS:  
179 FOLFOX plus bevacizumab therapy  
180 Fluorouracil (bolus) 400 mg/m<sup>2</sup> on Day 1, fluorouracil (continuous infusion over 46  
181 hours) 2,400 mg/m<sup>2</sup> on Day 1, oxaliplatin 85 mg/m<sup>2</sup> on Day 1, folinic acid 200 mg/m<sup>2</sup>  
182 on Day 1, and bevacizumab 5 mg/kg on Day 1, every 2 weeks  
183  
184 In the absence of Ras mutations  
185 FOLFIRI plus cetuximab/panitumumab therapy  
186 Irinotecan 150 mg/m<sup>2</sup> on Day 1, fluorouracil (bolus) 400 mg/m<sup>2</sup> on Day 1, fluorouracil  
187 (continuous infusion over 46 hours) 2,400 mg/m<sup>2</sup> on Day 1, and folinic acid 200 mg/m<sup>2</sup>  
188 on Day 1  
189 Plus  
190 Cetuximab 250 mg/m<sup>2</sup> (400 mg/m<sup>2</sup> for the first dose only) on Days 1 and 8  
191 Or  
192 Panitumumab 6 mg/kg on Day 1  
193 Every 2 weeks  
194  
195 (4) Breast cancer as inferred by using NGS:  
196 In HER2-positive patients (in cases where NGS analysis suggests HER2 amplification),  
197 one of the following will be administered. (It is recommended to verify the analysis  
198 results based on immunohistochemistry [IHC] or fluorescence in situ hybridization  
199 [FISH] in line with the usual practice of the study site.)  
200 (Pertuzumab plus trastuzumab plus docetaxel therapy)  
201 Docetaxel 75 mg/m<sup>2</sup> plus trastuzumab 6 mg/kg plus pertuzumab 420 mg/body  
202 The first dose of trastuzumab should be 8 mg/kg.  
203 Docetaxel, trastuzumab, and pertuzumab will be administered every 3 weeks (on Day  
204 1, every 3 weeks).  
205  
206 For other HER2 statuses, one of the following will be administered.  
207 Anthracyclines or taxanes will be used.  
208 Anthracyclines:  
209 AC therapy Doxorubicin 50 mg/m<sup>2</sup> on Day 1 and cyclophosphamide 500 mg/m<sup>2</sup> on  
210 Day 1, every 3 weeks, or  
211 EC therapy Epirubicin 60 mg/m<sup>2</sup> on Day 1 and cyclophosphamide 500 mg/m<sup>2</sup> on  
212 Day 1, every 3 weeks  
213  
214 Taxanes:  
215 Paclitaxel therapy Paclitaxel 80 mg/m<sup>2</sup> on Days 1, 8, and 15, every 4 weeks, or  
216 Docetaxel therapy Docetaxel 75 mg/m<sup>2</sup> on Day 1, every 3 weeks  
217  
218 (5) Pancreatic cancer as inferred by using NGS:  
219 Gemcitabine therapy

- 220 Gemcitabine 1,000 mg/m<sup>2</sup> on Days 1, 8, and 15, every 4 weeks  
221 FOFIRINOX therapy  
222 Fluorouracil (bolus) 400 mg/m<sup>2</sup> on Day 1, fluorouracil (continuous infusion over 46  
223 hours) 2,400 mg/m<sup>2</sup>, oxaliplatin 85 mg/m<sup>2</sup> on Day 1, and irinotecan 180 mg/m<sup>2</sup> on Day 1,  
224 every 2 weeks  
225
- 226 (6) Biliary tract cancer as inferred by using NGS:  
227 Split-dose cisplatin plus gemcitabine therapy  
228 Cisplatin 25 mg/m<sup>2</sup> on Days 1 and 8 and gemcitabine 1,000 mg/m<sup>2</sup> on Days 1, 8, and 15,  
229 every 3 weeks  
230
- 231 (7) Hepatocellular carcinoma as inferred by using NGS:  
232 Sorafenib 400 mg/dose, twice daily (oral daily administration)  
233
- 234 (8) Bladder cancer as inferred by using NGS:  
235 Cisplatin plus gemcitabine therapy  
236 Cisplatin 70 mg/m<sup>2</sup> on Day 2 and gemcitabine 1,000 mg/m<sup>2</sup> on Days 1, 8, and 15, every 4  
237 weeks  
238
- 239 (9) Renal cancer as inferred by using NGS:  
240 Sunitinib 50 mg/day for 4 weeks, followed by a 2-week washout period  
241
- 242 (10) Prostate cancer as inferred by using NGS:  
243 LH-RH analogue:  
244 Leuplin 3.75 mg, subcutaneous injection, every 4 weeks  
245
- 246 (11) Cervical cancer as inferred by using NGS:  
247 Carboplatin plus paclitaxel therapy  
248 Carboplatin AUC 5 and paclitaxel 175 mg/m<sup>2</sup>, both on Day 1, every 3 weeks  
249
- 250 (12) Ovarian cancer as inferred by using NGS:  
251 Carboplatin plus paclitaxel therapy  
252 Carboplatin AUC 5 and paclitaxel 175 mg/m<sup>2</sup>, both on Day 1, every 3 weeks  
253 Additionally, bevacizumab 15 mg/kg on Day 1 every 3 weeks should be considered if  
254 possible.  
255
- 256 (13) Head and neck cancer as inferred by using NGS:  
257 FP plus cetuximab therapy  
258 Cisplatin 80 mg/m<sup>2</sup> on Day 1, fluorouracil 800 mg/m<sup>2</sup> on Days 1-4 (continuous  
259 administration), and cetuximab 250 mg/m<sup>2</sup> (400 mg/m<sup>2</sup> for the first dose only) on Day 1,  
260 8, and 15, every 3 weeks  
261
- 262 (14) Esophageal cancer as inferred by using NGS:  
263 FP therapy  
264 Cisplatin 80 mg/m<sup>2</sup> on Day 1 and fluorouracil 800 mg/m<sup>2</sup> (continuous administration) on  
265 Days 1-5, every 4 weeks  
266
- 267 (15) Malignant lymphoma as inferred by using NGS:  
268 (R)-CHOP therapy Rituximab may be added at the discretion of the study site.  
269 The presence of CD20 expression will be determined by expression analysis in cases  
270 where malignant lymphoma is inferred.

- 271 Rituximab may be added.  
 272 Cyclophosphamide 750 mg/m<sup>2</sup> on Day 1, doxorubicin 50 mg/m<sup>2</sup> on Day 1, vincristine  
 273 1.4 mg/m<sup>2</sup> (maximum: 2 mg/body) on Day 1, and prednisolone 100 mg/body on Days  
 274 1-5, oral administration, every 3 weeks  
 275 (If rituximab is added) Rituximab 375 mg/m<sup>2</sup> on Day -1,  
 276  
 277 (16) Neuroendocrine carcinoma as inferred by using NGS:  
 278 Cisplatin plus etoposide therapy  
 279 Cisplatin 80 mg/m<sup>2</sup> on Day 1 and etoposide 100 mg/m<sup>2</sup> on Days 1-3, every 3 weeks  
 280  
 281 (17) Germinoma as inferred by using NGS:  
 282 BEP therapy  
 283 Cisplatin 20 mg/m<sup>2</sup> on Days 1-5, etoposide 100 mg/m<sup>2</sup> on Days 1-3, and bleomycin 30 U  
 284 on Days 2, 9, and 16, every 3 weeks (for all three drugs)  
 285  
 286 (18) Soft tissue sarcoma as inferred by using NGS:  
 287 Doxorubicin monotherapy  
 288 Doxorubicin 75 mg/m<sup>2</sup> on Day 1, every 3 weeks  
 289 c-KIT mutation-positive (gastrointestinal stromal tumor [GIST] as inferred by using  
 290 NGS):  
 291 Imatinib: 400 mg once daily  
 292

## 293 **2. Background**

### 294 **2-1 Carcinoma of unknown primary site**

295 Carcinoma of unknown primary site is, as the name suggests, an all-inclusive term for any  
 296 cancer in which metastatic lesions have been identified but not the primary site despite  
 297 extensive search. Carcinoma of unknown primary site is believed to account for about 3% to 5%  
 298 of all cancers, and the patient population is highly heterogeneous because the site of origin  
 299 varies from patient to patient. The prognosis is generally poor, and the median survival time  
 300 (MST) is considered to be 6 to 12 months. In Western countries, the concept of carcinoma of  
 301 unknown primary site has been established, and chemotherapy, which is systemic treatment, is  
 302 generally indicated since only metastatic lesions are present. Surgery and radiotherapy, which  
 303 are local treatment modalities, may be employed as part of multimodality therapy in  
 304 combination with chemotherapy, but it is not unusual that they are not indicated.

305 Thus far, several clinical studies have been reported on the treatment of carcinoma of unknown  
 306 primary site. In general, however, these studies excluded sarcomas, malignant lymphomas, and  
 307 malignant melanomas, and dealt with narrowly defined carcinoma of unknown primary site,  
 308 focusing on epithelial tumors such as adenocarcinoma, anaplastic carcinoma, and squamous cell  
 309 carcinoma.  
 310

### 311 **2-2. Standard treatment for carcinoma of unknown primary site**

312 As mentioned in the previous section, the mainstay of treatment for carcinoma of unknown  
 313 primary site is chemotherapy. To date, however, there have been no reports of large-scale phase  
 314 III controlled studies that address the value of chemotherapy, including those in which palliative  
 315 care (best supportive care: BSC) is subjected to comparison. Therefore, no standard treatment  
 316 for this type of tumor is currently available, and the usefulness of chemotherapy in patients with  
 317 this condition is even unclear.

318 On the other hand, certain groups of patients with carcinoma of unknown primary site are  
 319 thought to have a good prognosis, and there are accepted appropriate treatment modalities for  
 320 such groups of patients.

- 321 (1) Adenocarcinoma of unknown primary site in women with axillary adenopathy alone

- 322 (Treated similarly to breast cancer)
- 323 (2) Adenocarcinoma in women with peritoneal dissemination (ascites) alone (Treated
- 324 similarly to ovarian cancer)
- 325 (3) Squamous cell carcinoma with cervical lymphadenopathy alone (Treated similarly to
- 326 head and neck cancer)
- 327 (4) Squamous cell carcinoma with inguinal lymphadenopathy alone (Excision)
- 328 (5) Patients with features of germ cell neoplasms or neuroendocrine tumors
- 329 (6) A high PSA level as a serum/intratumor tumor marker in men with sclerotic bone
- 330 metastases alone (Treated similarly to prostate cancer)

331 These patients, as well as those with sarcoma, malignant lymphoma, and malignant melanoma,

332 have been excluded from recent clinical studies of carcinoma of unknown primary site.

333 Regarding chemotherapy for carcinoma of unknown primary site, fluorouracil (5-FU),

334 cyclophosphamide, doxorubicin, and other agents have been tried since the 1980s, but the

335 response rate was disappointingly low at 20% to 30%, with an MST of 4 to 9 months. Later on,

336 cisplatin was developed and studied in an extremely small controlled study (involving less than

337 100 patients, albeit conducted as a phase III study), but no superiority of cisplatin was

338 demonstrated and no conclusive results were shown that would warrant the inclusion of

339 cisplatin in treatment strategies<sup>1-2</sup>). As new agents, such as taxanes, gemcitabine, and irinotecan

340 hydrochloride, were introduced for the treatment of various cancer types in the 1990s, a number

341 of phase II studies were conducted for carcinoma of unknown primary site, mainly in

342 combination with platinum-containing drugs<sup>3-7</sup>). Although such studies were nothing more than

343 phase II studies, the results were far superior to those for previous drugs, with a 30–40%

344 response rate and an MST of longer than 12 months in some studies. In particular, combination

345 therapy using a platinum-containing drug (carboplatin) and a taxane (paclitaxel) showed the

346 most promising results, and carboplatin plus paclitaxel is currently the most frequently used

347 regimen in clinical practice. However, once again, the usefulness of chemotherapy for

348 carcinoma of unknown primary site remains unclear, and there are no drugs that can be

349 positioned as the standard treatment for this condition.

350

### 351 **2-3. Current status and issues on the microarray-based inference of primary lesions in**

### 352 **carcinoma of unknown primary site**

353 Recent advances in molecular biology have suggested the possibility of identifying the primary

354 site from the genetic information of tumor tissue, and methods have been developed to identify

355 the primary site by combining gene chips with current diagnostic imaging techniques.

356 One of the most proactively developed techniques to date is microarray technology, which is

357 characterized by the ability to search for unknown useful genes in the whole genome.

358 It has been reported that it is possible to locate the primary site with 78–85% accuracy by

359 examining the expression of 110 to 16,000 genes through a microarray approach in a range of

360 solid tumors with an established primary lesion<sup>8-11</sup>). At present, there are only a few

361 retrospective reports on whether these microarray techniques can be used to infer the primary

362 site in carcinoma of unknown primary site. Nonetheless, microarray techniques may be useful

363 for inferring the primary site in this condition. Since 2008, a group led by Nakagawa has been

364 conducting a phase II prospective controlled study to examine whether a treatment strategy

365 based on the inference of primary site using microarray can lead to the improvement of

366 prognosis of carcinoma of unknown primary site. On the basis of this phase II study, treatment

367 strategies involving the inference of primary site may be further investigated for suitability as

368 standard treatment for carcinoma of unknown primary site in phase III studies.

369 Microarray is useful for inferring the primary lesion in carcinoma of unknown primary site, but

370 there are some problems. Microarrays using cDNA, which is obtained from mRNA (obtained

371 from tumor tissue) via reverse transcription, require plenty of high-quality RNA, and thus

372 extraction of RNA from frozen tissue is often essential. Tissues obtained by tumor biopsy in



373 daily clinical practice are often paraffin-embedded (FFPE) blocks/sections, and microarray  
374 analysis of RNA obtained from these blocks and sections does not guarantee accuracy. It is  
375 therefore necessary to establish more optimum methods to search for gene expression in order  
376 to utilize the inference of primary site in patients with carcinoma of unknown primary site in  
377 day-to-day clinical practice in the future.

#### 378 **2-4. Inference of primary lesions by next-generation sequencing in carcinoma of unknown** 379 **primary site**

380 Over the past decade, it has been shown that a broad array of gene mutations and gene  
381 amplifications are involved in malignant traits of various cancers. Particularly in cases where  
382 malignant traits depend on a single or a small number of genetic abnormalities (oncogene  
383 addiction), molecular-targeted drugs that inhibit such genetic abnormalities have been shown to  
384 be useful. Examples include EGFR-TKIs for non-small cell lung cancer with EGFR mutations.  
385 Next-generation sequencing (NGS) may be used as a means for searching for such gene  
386 mutations and amplifications.

387 Sanger sequencing has been used to decode biological DNA sequences for more than 20 years.  
388 While Sanger sequencing is highly accurate in decoding DNA sequences, its processivity is low,  
389 with the number of bases that can be decoded in a single analysis being limited. In recent years,  
390 NGS with an extremely high processivity has been developed, enabling ultra-high-speed DNA  
391 sequencing and mass decoding. RNA-Seq, which uses NGS to analyze the sequence of RNA,  
392 allows quantification of gene expression with a small amount of RNA and can be used as an  
393 alternative to the quantification of RNA expression by microarray. More recently, the  
394 development of a technology called target sequencing, which analyzes several dozen to 300  
395 useful genes for diagnosis and treatment, has made it possible to analyze gene mutations and  
396 gene expression by using a fairly small amount of samples. NGS also has a function to count the  
397 number of gene reads, and gene amplification can be estimated from the number of reads.  
398 Specifically, the analysis can be performed using 10 ng equivalent of gDNA extracted from an  
399 FFPE sample for gene mutation and 5 ng equivalent of RNA extracted from an FFPE sample for  
400 gene expression analysis. Thus, NGS may be highly useful for carcinoma of unknown primary  
401 site because it can analyze multiple gene expression, gene mutation, and gene amplification  
402 using FFPE samples in a short time and at a low cost.

#### 403 **2-5. Significance of this study**

404 Recent advances in molecular biology have suggested the possibility of locating the primary site  
405 based on genetic information in tumor tissue. This study aims to identify the primary site and  
406 cancer-specific genetic abnormalities (mutations/amplifications) by using NGS in conjunction  
407 with the current diagnostic imaging techniques. The gene mutations and amplifications (EGFR  
408 mutation in non-small cell lung cancer, KIT mutation in GIST, HER2 amplification in gastric  
409 cancer and breast cancer, and RAS mutation in colorectal cancer) that are currently used in  
410 clinical practice will be identified. Then, it will be verified whether the application of treatment  
411 strategies for these mutations to the treatment of carcinoma of unknown primary can help  
412 improve the outcome of patients. In this study, a highly reproducible analysis of gene expression  
413 profile will be carried out with a fairly small amount of samples in order to infer the primary  
414 site by performing RNA-Seq with an original panel (CUPanel) containing approximately 150  
415 primary-specific gene signatures and reference genes for correction using NGS. This study is  
416 designed to determine whether such a treatment strategy can be useful as a treatment strategy  
417 for carcinoma of unknown primary site.

#### 418 **3. Ethical conduct of the study**

419 The ethical principles of the Declaration of Helsinki and the Ethical Guidelines for  
420 Clinical Research will be observed in conducting this study, and the human rights,  
421  
422  
423

424 welfare, and safety of study subjects will be ensured to the full extent.

425 **3.1. Protection of the subjects' privacy**

426 The names of subjects will not be disclosed by the participating sites to the data center.  
427 Subjects will be identified and referred to using the case registration number  
428 (anonymized number) issued at the time of enrollment, and no information that can be  
429 used to identify the patient by a third party, such as the patient's name, will be entered  
430 into the database.

431

432 **3.2. Approval by the institutional review board**

433 This study protocol and the written informed consent form should be approved by the  
434 institutional review board of each participating institution.

435

436 **3.3. Compliance with the study protocol**

437 Researchers participating in this study should comply with the study protocol to the  
438 extent that such actions do not undermine the safety and human rights of the patients.

439

440 **3.4. Management of conflicts of interest (COI)**

441 The COI of persons involved in clinical practice at participating institutions, such as  
442 facility representatives and liaison officers, should be handled in accordance with the  
443 regulations of the respective participating institutions.

444 Conflicts of interest of researchers who play an important role in this study, such as the  
445 Study Chair, will be managed by the Academic Support Division of the Kindai  
446 University Faculty of Medicine.

447

448 **4. Purpose of the study**

449 To examine whether the use of NGS to infer the primary site and to detect specific gene  
450 mutations and gene amplifications is meaningful in patients with previously untreated  
451 carcinoma of unknown primary site in a phase II study

452

453 Primary endpoint: 1-year survival rate

454 Secondary endpoints: Overall survival, progression-free survival, antitumor effect, safety,  
455 the relationship between the inferred primary site and therapeutic effect (exploratory  
456 investigation), and the frequency of gene mutations/amplifications in carcinoma of  
457 unknown primary site.

458

459 **5. Study design**

460 Multicenter phase II study

461

462 **6. Drugs used in the study**

463 Commercially available drugs used at medical institutions will be used as study drugs in this  
464 study.

465

466

467 **7. Patient inclusion and exclusion criteria**

468 **7.1. Inclusion criteria**

469 Eligible patients should satisfy all of the following conditions.

470 (1) Epithelial carcinoma of unknown primary site with histologically confirmed metastatic  
471 tumors (Any patients histologically diagnosed with malignant melanoma, malignant  
472 lymphoma, or sarcoma should be excluded, and the investigator should do the utmost to  
473 exclude patients with these conditions.)

474 (2) Chemotherapy-naïve patients (However, patients who received chemotherapy for

- 475 malignant tumors cured more than 5 years previously may be enrolled.)  
 476 (3) Patients from whom a pre-treatment tumor tissue can be obtained as a paraffin-embedded  
 477 tissue  
 478 (4) Patients aged 20 years or older (as of the date of informed consent)  
 479 (5) Patients with an ECOG performance status (PS) of 0 to 2  
 480 (6) Patients with no major organ damage (bone marrow, heart, lungs, liver, kidneys) and  
 481 laboratory test values at the time of treatment initiation satisfying the following criteria  
 482 (based on data within 14 days before enrollment; the study enrollment date is counted as  
 483 Day 1, and the same day of the week two weeks prior is acceptable.)  
 484

|                           |                            |
|---------------------------|----------------------------|
| Hemoglobin                | $\geq 9.0$ g/dL            |
| White blood cell count    | $\geq 4,000/\text{mm}^3$   |
| Platelet count            | $\geq 100,000/\text{mm}^3$ |
| GOT and GPT (AST and ALT) | $\leq 100$ IU/L            |
| Total bilirubin           | $\leq 1.5$ mg/dL           |
| Serum creatinine          | $\leq 1.5$ mg/dL           |

- 485 (7) Patients who were fully informed of the study content and voluntarily provided written  
 486 consent prior to the start of the study  
 487  
 488

## 489 7.2. Exclusion criteria

- 490 (1) Patients for whom radical surgery or definitive radiation therapy is indicated  
 491 (2) Patients receiving palliative radiation therapy for bone and brain metastases except the  
 492 primary lesion. However, patients with a 2-week interval between irradiation and the  
 493 initiation of study treatment may be enrolled.  
 494 (3) A certain population of patients with carcinoma of unknown primary site have a good  
 495 prognosis, and a standard treatment modality has been established for such patients.  
 496 Therefore, the following patients will be excluded from this study.  
 497 [1] Adenocarcinoma of unknown primary site in women with axillary adenopathy alone  
 498 (Treated similarly to breast cancer)  
 499 [2] Adenocarcinoma in women with peritoneal dissemination (ascites) alone (Treated  
 500 similarly to ovarian cancer)  
 501 [3] Squamous cell carcinoma with cervical lymphadenopathy alone (Treated similarly to  
 502 head and neck cancer)  
 503 [4] Squamous cell carcinoma with inguinal lymphadenopathy alone (Excision)  
 504 [5] Patients with features of germ cell neoplasms or neuroendocrine tumors  
 505 [6] A high PSA level as a serum/intratumor tumor marker in men with sclerotic bone  
 506 metastases alone (Treated similarly to prostate cancer)  
 507 (4) Patients with active, serious infections  
 508 (5) Patients with symptomatic brain metastases. Patients requiring antiedema drugs such as  
 509 steroids for symptom control. (However, patients with clinically stable, asymptomatic,  
 510 known brain metastases that do not require treatment may be enrolled.)  
 511 (6) Patients with interstitial pneumonia or pulmonary fibrosis evident on chest x-ray  
 512 (7) Patients with a history of bone marrow transplantation or peripheral blood stem cell  
 513 transplantation  
 514 (8) Patients with poorly controlled diabetes  
 515 (9) Patients with a history of clinically significant serious drug allergy  
 516 (10) HBs antigen-positive patients  
 517 (11) Patients receiving continuous systemic administration of steroids or other  
 518 immunosuppressant drugs (orally or intravenously)  
 519 (12) Patients with mental disorder or psychiatric symptoms who are assumed to have

- 520 difficulty participating in the study  
521 (13) Pregnant women, lactating women, patients who may be pregnant, and patients who  
522 wish to become pregnant  
523 (14) Patients with unstable angina (angina that has developed or has worsened in the last 3  
524 weeks) or a history of myocardial infarction within 6 months  
525 (15) Patients with poorly controlled hypertension  
526 (16) Patients with active gastrointestinal hemorrhage  
527 (17) Patients with active double cancer  
528 Note: Double cancer is defined as synchronous multiple cancers and metachronous multiple  
529 cancers with a disease-free interval of 5 years or less. Carcinoma in situ or lesions  
530 equivalent to intramucosal carcinoma that are considered cured by local treatment are not  
531 included in active double cancer.  
532 (18) Patients with reproductive potential who are not willing to use contraception during the  
533 study  
534 (19) Other patients deemed inappropriate by the investigator or subinvestigator

535  
536

537 Contact for inquiries about the protocol:

538 **Study Coordinator**

539 Hidetoshi Hayashi

540 Department of Medical Oncology, **Faculty of Medicine, Kindai University**

541 377-2 Ohno-higashi Sasayama-shi Osaka, Japan, 589-8511

542 Tel: 072-366-0221 Fax: 072-360-5000

543 E-mail: hidet31@gmail.com

544  
545

546 **8. Informed consent**

547 **8.1. Creation of informed consent form**

548 The physician in charge at each participating institution should create a site-specific  
549 informed consent form with reference to the master informed consent form. The informed  
550 consent form and the study protocol should be approved by the institutional review board.

551

552 **8.2. Obtaining consent**

553 Before a subject participates in the study, the physician in charge should hand the subject  
554 the informed consent form (after approval by the institutional review board) and provide a  
555 thorough explanation of the items listed in the following section. Prospective subjects  
556 should also be given the opportunity to ask questions and enough time to decide whether to  
557 participate in the study.

558 After confirming that the subject has fully understood the content of the study, the  
559 physician in charge should obtain the subject's written consent for voluntary participation  
560 in the study. The physician in charge should also hand the subject a copy of the signed (or  
561 signed and sealed) informed consent form immediately. The original consent form should  
562 be properly retained at each study site for three years after the end of the study period.

563

564 **8.3. Items to be explained to subjects by using informed consent form**

- 565 (1) Disease name and the condition of the disease  
566 (2) The nature of this study, which is to be conducted as a clinical study involving  
567 translational research  
568 (3) Rationale and purpose of this study  
569 (4) Methods of the study and treatment details (Drug name, administration method,  
570 dose amount, treatment cycle, overall study duration)

- 571 (5) Expected effects and potential adverse reactions  
572 (6) Burden of expense and compensation (Explanation that treatment expenses are  
573 covered by the health insurance system and that compensation for health damage is  
574 handled in the same way as in general clinical practice)  
575 (7) Presence/absence of alternative therapies and their details  
576 (8) Expected benefits and potential disadvantages to patients participating in the study  
577 (9) Direct access to medical history (Explanation on the acceptance of facility  
578 inspection for the sake of accuracy control, including direct access by medical  
579 personnel at other facilities to medical records with the permission of the facility  
580 director)  
581 (10) Refusal and withdrawal of consent (Patients will not be disadvantaged even  
582 if they do not agree to participate in the study, and they can freely withdraw their  
583 consent after participation.)  
584 (11) Protection of human rights (Confidentiality of the names and other personal  
585 information of patients)  
586 (12) Freedom to ask questions (Written contact information of not only the  
587 attending physician but also the Study Chair [or the Study Coordinator] will be  
588 provided, and patients will be allowed to freely ask questions about the study or  
589 treatment details.)  
590 (13) Management of conflicts of interest  
591 (14) Storage, disposal, and secondary use of samples (Anonymized clinical  
592 information will be stored at the WJOG Data Center and the Department of  
593 Medical Oncology, Kindai University Faculty of Medicine, and samples will be  
594 stored at the Department of Genome Biology, Kindai University Faculty of  
595 Medicine. They will be stored for five years after the end of the study period and  
596 then discarded. If a subject withdraws consent to the use of clinical information  
597 and samples, the samples will be immediately discarded.)  
598

## 599 **9. Registration of patients**

### 600 **9.1. Registration procedure**

- 601 (1) After confirming that a prospective subject satisfies all of the inclusion criteria  
602 and does not fall under any of the exclusion criteria, the participating institution  
603 will fill out the Registration Form and fax it to the WJOG Data Center  
604 (information to be included: facility name, department, physician in charge,  
605 patient's initials, height, weight, date of consent, facility ID, date of birth, and  
606 age).  
607 (2) The Data Center will check the Registration Form for eligibility and fax a case  
608 registration number (anonymized number) as well as the sex of the subject to the  
609 participating institution, the Study Coordinator, and the Department of Genome  
610 Biology, Kindai University Faculty of Medicine.  
611 (3) Participating institutions should send tumor tissue samples with a case  
612 registration number to the Department of Genome Biology, Kindai University  
613 Faculty of Medicine, together with a report from the pathologist at the site where  
614 the subject has been registered (a photomicrograph of hematoxylin-eosin stained  
615 specimens should be appended whenever possible).  
616 (4) The Department of Genome Biology, Kindai University Faculty of Medicine will  
617 report the analysis results to the Study Coordinator. Then, the Study Coordinator  
618 will send the Notification of Primary Site Inference Result with the case  
619 registration number (anonymized number) to the Study Coordinator by email.  
620 (5) Upon receiving the Notification of Primary Site Inference Result, the Data Center  
621 will report the result of primary site inference to the participating institution.

622  
623  
624

- (6) The participating institution will start treatment within two weeks after receipt of the Notification of Primary Site Inference Result.

Contact for case registration and reception hours:  
WJOG Data Center  
Tel.: +81-6-6633-7400; Fax: +81-6-6633-7405  
Email: datacenter@wjog.jp  
Reception hours: 9 a.m. to 5 p.m., Monday to Friday (except national holidays and year-end and New Year holidays [December 29 to January 3])

## 9.2. Notes on registration

- (1) A Registration Form will not be accepted unless all entries in it have been completed.
- (2) A Notification of Registration Result with a case registration number will be issued only after eligibility has been confirmed by the Data Center. The sending of a Notification of Registration Result should be deemed to constitute an official registration.
- (3) The Notification of Registration Result faxed from the Data Center to the physician in charge of registration should be stored.
- (4) Once registered, patients will not be de-registered (i.e., they will not be deleted from the database). In the case of duplicate registration, only the information obtained at the first registration (and the first registration number) should be used in all instances.
- (5) If misregistration or duplicate registration is found, the Data Center should be contacted immediately.
- (6) Body surface area and dose amount should be calculated and confirmed at the facility.

## 10. Protocol treatment

In principle, protocol therapy should be initiated within two weeks (the same day of the week two weeks later is acceptable) after receipt of the Notification of Primary Site Inference Result from the WJOG Data Center. It is desirable to reconfirm that the eligibility criteria are still satisfied within one week before the start of administration.

### 10.1 Treatment regimen by cancer type as inferred by using NGS

The primary site will be inferred by using NGS. Based on the inference, treatment will be provided with a regimen that is considered standard. Standard treatment for the primary lesion as inferred at the time of enrollment will be provided. Example are shown below. The standard treatment for the primary lesion should also be employed in second-line chemotherapy after disease progression whenever possible.

Examples for reference

- (1) Non-small cell lung cancer as inferred by using NGS:

Histological type: Squamous cell carcinoma

Carboplatin plus paclitaxel therapy

Carboplatin AUC 6 and paclitaxel 200 mg/m<sup>2</sup>, both on Day 1, every 3 weeks

Histological type: Non-squamous cell carcinoma (adenocarcinoma, large cell carcinoma)

Cisplatin plus pemetrexed therapy

Cisplatin 75 mg/m<sup>2</sup> and pemetrexed 500 mg/m<sup>2</sup>, both on Day 1, every 3 weeks

676 Premedication with vitamin B12 and folic acid preparation should be administered.  
677 Additionally, bevacizumab 15 mg/kg on Day 1 every 3 weeks should be considered if  
678 possible in non-squamous cell carcinoma.

679  
680

681 EGFR mutation-positive:  
682 Gefitinib: 250 mg once daily or  
683 Erlotinib: 150 mg once daily or  
684 Afatinib: 40 mg once daily

685

686 (2) Gastric cancer as inferred by using NGS:

687

Cisplatin plus S-1 therapy

688

Cisplatin 60 mg/m<sup>2</sup> on Day 8 and S-1 80 mg/m<sup>2</sup> on Days 1-21, every 5 weeks

689

690 HER2-positive patients (If NGS analysis suggests HER2 amplification, it is  
691 recommended to verify the result based on immunohistochemistry [IHC] or fluorescence  
692 in situ hybridization [FISH] in line with the routine practice of the study site.)

693

Cisplatin plus capecitabine plus trastuzumab therapy

694

Cisplatin 80 mg/m<sup>2</sup> on Day 1, capecitabine 2,000 mg/m<sup>2</sup> on Days 1-14, and trastuzumab  
695 6 mg/kg on Day 1 (8 mg/kg for the first dose)

696

697 (3) Colorectal cancer as inferred by using NGS:

698

FOLFOX plus bevacizumab therapy

699

Fluorouracil (bolus) 400 mg/m<sup>2</sup> on Day 1, fluorouracil (continuous infusion over 46  
700 hours) 2,400 mg/m<sup>2</sup> on Day 1, oxaliplatin 85 mg/m<sup>2</sup> on Day 1, folinic acid 200 mg/m<sup>2</sup>  
701 on Day 1, and bevacizumab 5 mg/kg on Day 1, every 2 weeks

702

703

In the absence of Ras mutations

704

FOLFIRI plus cetuximab/panitumumab therapy

705

Irinotecan 150 mg/m<sup>2</sup> on Day 1, fluorouracil (bolus) 400 mg/m<sup>2</sup> on Day 1, fluorouracil  
706 (continuous infusion over 46 hours) 2,400 mg/m<sup>2</sup> on Day 1, and folinic acid 200 mg/m<sup>2</sup>  
707 on Day 1

708

Plus

709

Cetuximab 250 mg/m<sup>2</sup> (400 mg/m<sup>2</sup> for the first dose only) on Days 1 and 8

710

Or

711

Panitumumab 6 mg/kg on Day 1

712

Every 2 weeks

713

714 (4) Breast cancer as inferred by using NGS:

715

In HER2-positive patients (in cases where NGS analysis suggests HER2 amplification),  
716 one of the following will be administered. (It is recommended to verify the analysis  
717 result based on immunohistochemistry [IHC] or fluorescence in situ hybridization  
718 [FISH] in line with the routine practice of the study site.)

719

(Pertuzumab plus trastuzumab plus docetaxel therapy)

720

Docetaxel 75 mg/m<sup>2</sup> plus trastuzumab 6 mg/kg plus pertuzumab 420 mg/body

721

The first dose of trastuzumab should be 8 mg/kg.

722

Docetaxel, trastuzumab, and pertuzumab will be administered every 3 weeks (on Day  
723 1).

724

725

For other HER2 statuses, one of the following will be administered.

726

Anthracyclines or taxanes will be used.



- 727 Anthracyclines:  
728 AC therapy Doxorubicin 50 mg/m<sup>2</sup> on Day 1 and cyclophosphamide 500 mg/m<sup>2</sup> on  
729 Day 1, every 3 weeks, or  
730 EC therapy Epirubicin 60 mg/m<sup>2</sup> on Day 1 and cyclophosphamide 500 mg/m<sup>2</sup> on  
731 Day 1, every 3 weeks  
732  
733 Taxanes:  
734 Paclitaxel therapy Paclitaxel 80 mg/m<sup>2</sup> on Days 1, 8, and 15, every 4 weeks, or  
735 Docetaxel therapy Docetaxel 75 mg/m<sup>2</sup> on Day 1, every 3 weeks  
736  
737 (5) Pancreatic cancer as inferred by using NGS:  
738 Gemcitabine therapy  
739 Gemcitabine 1,000 mg/m<sup>2</sup> on Days 1, 8, and 15, every 4 weeks  
740  
741 FOFIRINOX therapy  
742 Fluorouracil (bolus) 400 mg/m<sup>2</sup> on Day 1, fluorouracil (continuous infusion over 46  
743 hours) 2,400 mg/m<sup>2</sup>, oxaliplatin 85 mg/m<sup>2</sup> on Day 1, and irinotecan 180 mg/m<sup>2</sup> on Day  
744 1, every 2 weeks  
745  
746 (6) Biliary tract cancer as inferred by using NGS:  
747 Split-dose cisplatin plus gemcitabine therapy  
748 Cisplatin 25 mg/m<sup>2</sup> on Days 1 and 8 and gemcitabine 1,000 mg/m<sup>2</sup> on Days 1, 8, and 15,  
749 every 3 weeks  
750  
751 (7) Hepatocellular carcinoma as inferred by using NGS:  
752 Sorafenib 400 mg/dose, twice daily (oral daily administration)  
753  
754 (8) Bladder cancer as inferred by using NGS:  
755 Cisplatin plus gemcitabine therapy  
756 Cisplatin 70 mg/m<sup>2</sup> on Day 2 and gemcitabine 1,000 mg/m<sup>2</sup> on Days 1, 8, and 15, every 4  
757 weeks  
758  
759 (9) Renal cancer as inferred by using NGS:  
760 Sunitinib 50 mg/day for 4 weeks, followed by a 2-week washout period  
761  
762 (10) Prostate cancer as inferred by using NGS:  
763 LH-RH analogue  
764 Leuplin 3.75 mg, subcutaneous injection, every 4 weeks  
765  
766 (11) Cervical cancer as inferred by using NGS:  
767 Carboplatin plus paclitaxel therapy  
768 Carboplatin AUC 5 and paclitaxel 175 mg/m<sup>2</sup>, both on Day 1, every 3 weeks  
769  
770 (12) Ovarian cancer as inferred by using NGS:  
771 Carboplatin plus paclitaxel therapy  
772 Carboplatin AUC 5 and paclitaxel 175 mg/m<sup>2</sup>, both on Day 1, every 3 weeks  
773 Additionally, bevacizumab 15 mg/kg on Day 1 every 3 weeks should be considered if  
774 possible.  
775  
776 (13) Head and neck cancer as inferred by using NGS:  
777 FP plus cetuximab therapy

778 Cisplatin 80 mg/m<sup>2</sup> on Day 1, fluorouracil 800 mg/m<sup>2</sup> on Days 1-4 (continuous  
779 administration), and cetuximab 250 mg/m<sup>2</sup> (400 mg/m<sup>2</sup> for the first dose only) on Day 1,  
780 8, and 15, every 3 weeks

781  
782 (14) Esophageal cancer as inferred by using NGS:

783 FP therapy

784 Cisplatin 80 mg/m<sup>2</sup> on Day 1 and fluorouracil 800 mg/m<sup>2</sup> (continuous administration) on  
785 Days 1-5, every 4 weeks

786  
787 (15) Malignant lymphoma as inferred by using NGS:

788 (R)-CHOP therapy Rituximab may be added at the discretion of the study site.

789 The presence of CD20 expression will be determined by expression analysis in cases  
790 where malignant lymphoma is inferred.

791 Rituximab may be added.

792 Cyclophosphamide 750 mg/m<sup>2</sup> on Day 1, doxorubicin 50 mg/m<sup>2</sup> on Day 1, vincristine  
793 1.4 mg/m<sup>2</sup> (maximum: 2 mg/body) on Day 1, and prednisolone 100 mg/body on Days  
794 1-5, oral administration, every 3 weeks

795 (If rituximab is added) Rituximab 375 mg/m<sup>2</sup> on Day -1,

796

797 (16) Neuroendocrine carcinoma as inferred by using NGS:

798 Cisplatin plus etoposide therapy

799 Cisplatin 80 mg/m<sup>2</sup> on Day 1 and etoposide 100 mg/m<sup>2</sup> on Days 1-3, every 3 weeks

800

801 (17) Germinoma as inferred by using NGS:

802 BEP therapy

803 Cisplatin 20 mg/m<sup>2</sup> on Days 1-5, etoposide 100 mg/m<sup>2</sup> on Days 1-3, and bleomycin 30 U  
804 on Days 2, 9, and 16, every 3 weeks (for all three drugs)

805

806 (18) Soft tissue sarcoma as inferred by using NGS:

807 Doxorubicin monotherapy

808 Doxorubicin 75 mg/m<sup>2</sup> on Day 1, every 3 weeks

809 c-KIT mutation-positive (gastrointestinal stromal tumor [GIST] as inferred by using  
810 NGS):

811 Imatinib: 400 mg once daily

812

813

## 814 **10.24 Concomitant medications and therapies**

815

### **10.24.1. Prohibited concomitant medications and therapies**

816 During the administration of the study medication, any concomitant use of anticancer drugs,  
817 biological response modifiers (BRM), hormone therapy, thermotherapy, radiation therapy,  
818 or other investigational drugs that may affect the study and are not planned at the time of  
819 enrollment should be prohibited. If drugs requiring particular attention to concomitant use  
820 are to be used in combination of the study drug, due caution should be exercised.

821

822

### **10.24.2. Supportive care**

823 No specific restrictions will be posed on the use of antiemetics, blood transfusions, G-CSF  
824 preparations, analgesics, and tranquilizers used under health insurance coverage.

825

## 826 **11 Completion or discontinuation of the study**

827 The criteria for completion and discontinuation are defined as follows. The study should be  
828 discontinued if any of the following discontinuation criteria is met during the study period.

829

|                  |                                                                                                                                                                                                                            |
|------------------|----------------------------------------------------------------------------------------------------------------------------------------------------------------------------------------------------------------------------|
| Study completion | None of the discontinuation criteria shown below is met during the specified study period, and subjects have received no fewer than the standard treatment courses of the standard regimen for respective types of cancer. |
|------------------|----------------------------------------------------------------------------------------------------------------------------------------------------------------------------------------------------------------------------|

830

|                          |                                                                                           |
|--------------------------|-------------------------------------------------------------------------------------------|
| Discontinuation criteria | Presence of the necessity of discontinuing the study as judged by the attending physician |
|                          | Occurrence of grade 4 non-hematologic toxicity                                            |
|                          | Occurrence of grade 3 or higher interstitial pneumonia                                    |
|                          | Failure of protocol treatment (judged to be ineffective)                                  |
|                          | Patient's refusal to continue treatment                                                   |
|                          | Death occurring prior to discontinuation of study treatment for other reasons             |

831

832 **12 Post-treatment**

833 In principle, patients who have discontinued or completed the study will not receive treatment  
834 specifically for carcinoma of unknown primary site unless re-exacerbation of the disease is  
835 noted. However, this does not apply when such treatment is provided as a result of prioritizing  
836 the patient's wishes and benefits.

837

838 **13 Items to be measured and observed and the timing thereof**839 **13.1 Definition of the study period and follow-up period**

840 The study period and follow-up period for each subject are defined as follows.

841

|                  |                                                                                                                                                        |
|------------------|--------------------------------------------------------------------------------------------------------------------------------------------------------|
| Study period     | From the date of registration until 4 weeks after the final dose<br>or until the start of post-treatment initiated within 4 weeks after the final dose |
| Dosing period    | From the first administration day until the last administration day                                                                                    |
| Follow-up period | From the end of the study period until 1 year after the registration of the last patient                                                               |

842

843 **13.2 Items to be measured and observed before the start of treatment**

844

## (1) Patient characteristics

845

846

847

848

849

850

851

852

853

854

855

## (2) Determination of tumor localization site

856

857

858

859

860

Plain chest x-ray, thoracoabdominal CT (contrast media should be used in principle), brain MRI, or brain CT (contrast media should be used in principle) will be performed to determine the tumor localization site within 28 days prior to registration (the same day of the week four weeks prior is acceptable). Whole-body PET(/CT) will also be performed if possible.

- 861 (3) Subjective and objective findings  
862 Subjective and objective findings will be confirmed within 14 days prior to  
863 registration. (The same day of the week 14 days prior as the registration date  
864 is acceptable.) It is desirable to reconfirm subjective and objective findings  
865 immediately before administration.  
866 PS, nausea, vomiting, anorexia, fatigue, constipation, diarrhea,  
867 maculopapular rash, hyperpigmentation of the skin, allergic reactions,  
868 peripheral motor neuropathy, peripheral sensory neuropathy, oral mucositis,  
869 alopecia, pain, pneumonitis, phlebitis, pyrexia, febrile neutropenia, and other  
870 grade 3 adverse events  
871 Note: Conditions immediately before dosing should be described in case  
872 report forms.
- 873 (4) Laboratory tests  
874 HBs antigen, HBs antibody, HBc antibody, and HCV antibody will be  
875 determined before registration.  
876 This may be performed at any time before registration.  
877 The following tests will be performed within 14 days prior to registration.  
878 (The same day of the week 14 days prior as the registration date is  
879 acceptable.) It is desirable to reconfirm test values immediately before  
880 administration.  
881 Peripheral blood counts: White blood cell, neutrophil (ANC: stab and  
882 segmented neutrophils), hemoglobin, and platelet  
883 Blood biochemistry: Total protein, albumin, total bilirubin, AST (GOT), ALT  
884 (GPT), creatinine, LDH, BUN, Na, K, Cl, Ca, CRP, Ccr (Cockcroft-Gault  
885 method or 24-hour creatinine clearance)  
886 Tumor markers (if elevation is noted), 12-lead ECG  
887

### 888 13.3 Items to be measured and observed during the study period

889 The following tests and observations will be performed. The items described in 1) and  
890 2) will be investigated at least once per course (every 3 to 5 weeks depending on the  
891 regimen) for the first 6 months after the start of treatment. Thereafter, they will be  
892 investigated at least once every 6 to 10 weeks. Regarding 3), assessment will be  
893 carried out every 2 to 3 courses. While 1) through 3) are mandatory, 4) is optional. For  
894 regimens in which the duration of 1 course cannot be clearly defined (e.g., daily oral  
895 administration), 1 course should be deemed to comprise 21 days.

- 896 1) Subjective and objective symptoms: Same as those described in Section  
897 13.2(3)
- 898 2) Blood tests: Same as the blood tests described in Section 13.2(4) (except for  
899 Ccr, HBs antigen, HBs antibody, HBc antibody, and HCV antibody)
- 900 3) Tumor assessment (diagnostic imaging that allows the evaluation of  
901 antitumor effects)
- 902 4) Tumor markers (if elevation is noted) (once a month)
- 903 5) Type of treatment regimen, dose of each drug, and date of administration (in  
904 “/m<sup>2</sup>” or “/body”)

### 905 13.4 Items to be measured and observed during the follow-up period

906 The follow-up period is 1 year following the date of registration of the last patient. The  
907 tests and observations below will be performed during this period. In the event a  
908 subject dies, follow-up will be terminated at that time.

- 909 1) Until 1 year after registration, subjects will be examined and receive image  
910 assessment for antitumor effects at least once every 2 months until disease  
911

912 progression is noted.  
913 2) Tumor markers (elevation in CEA levels) should also be measured as often  
914 as possible, at least once every 2 months.  
915

916 In principle, periodic follow-up investigations will be conducted twice a year. Case  
917 report forms (follow-up forms) should be completed and submitted to the Data Center  
918 during the periodic follow-up investigations. In this study, the first periodic follow-up  
919 investigation after the end of the follow-up period (which is 1 year after registration of  
920 the last patient) is the final investigation.  
921

#### 922 Items to be described in case report forms

- 923 i. Outcome (information about survival)
- 924 ii. Tumor markers (if measured) and imaging test findings (up to 2 years after  
925 registration)
- 926 iii. Recurrence status (The date of recurrence should be identified even in cases  
927 where post-treatment has been provided before recurrence is documented.)
- 928 iv. Presence/absence of post-treatment (The details should also be described if  
929 applicable.)
- 930 v. Primary site (if identified)

931 Note: Inferring the primary site by using NGS is a significant part of this study. Accordingly, in  
932 the event of death of a patient enrolled in this study, efforts will be made to obtain autopsy data  
933 whenever possible so that consistency with the inference results can be examined, although it is  
934 said that the primary site is rarely identified by autopsy in carcinoma of unknown primary site.  
935

936

### 937 **13.5 Storage of clinical information**

938 The clinical information obtained in this study will be anonymized at each site and then  
939 forwarded to the WJOG Data Center. The WJOG Data Center and the Study Coordinator will  
940 retain the clinical information for five years after the end of the study.  
941

942

943 **Study schedule**

|                                   | Before registration                                                            | Study period                                                          |                                                                                                                            |                                                                                                                               | Follow-up period<br>(Up to 1 year after registration of the last patient) |
|-----------------------------------|--------------------------------------------------------------------------------|-----------------------------------------------------------------------|----------------------------------------------------------------------------------------------------------------------------|-------------------------------------------------------------------------------------------------------------------------------|---------------------------------------------------------------------------|
|                                   |                                                                                | From registration until the start of administration                   | From the start of administration until 6 months                                                                            | From 6 months on                                                                                                              |                                                                           |
| Patient characteristics           | ✓<br>Height and weight should be measured within 14 days prior to registration |                                                                       |                                                                                                                            |                                                                                                                               | Medical consultation should be performed at least once every 2 months     |
| Subjective and objective symptoms | ✓<br>Within 14 days prior to registration                                      | To be reconfirmed immediately before administration whenever possible | ✓<br>At least once per course                                                                                              | ✓<br>At least once per 2 courses                                                                                              |                                                                           |
| Blood test                        | ✓<br>Within 14 days prior to registration                                      |                                                                       | ✓<br>At least once per course<br>Day before the start of the course, or before administration on the day of administration | ✓<br>At least once per 2 courses<br>Day before the start of the course, or before administration on the day of administration |                                                                           |
| Plain chest x-ray                 | ✓<br>Within 28 days before registration                                        |                                                                       | Every 2 to 3 courses                                                                                                       |                                                                                                                               | Every 2 months                                                            |
| CT and MRI                        | ✓<br>Within 28 days before registration                                        |                                                                       | Every 2 to 3 courses<br>(Imaging that allows the evaluation of antitumor effects)                                          |                                                                                                                               |                                                                           |
| PET*                              | ✓<br>Within 28 days before registration                                        |                                                                       |                                                                                                                            |                                                                                                                               |                                                                           |
| Tumor markers                     | ✓<br>Within 14 days prior to registration                                      |                                                                       | Once a month                                                                                                               |                                                                                                                               | Once every 2 months whenever possible                                     |

944  
945 \*PET(/CT) is desirable but not mandatory.

946  
947 **14 Ensuring safety**

948 **14.1 Basic matters to ensure the safety of subjects**

949 The treating physician should perform necessary and appropriate tests while the  
950 subject is participating in the study, and exercise caution to ensure subjects' safety. If  
951 an adverse event occurs, appropriate measures should be taken as necessary, and the  
952 cause of the event should be investigated with due consideration to ensuring the  
953 safety of the subject.

954  
955 **14.2 Expected adverse reactions**

956 Refer to the package insert of each anticancer drug.

957  
958 **15 Efficacy endpoint:**

959 **15.1 Progression-free survival**

960 Progression-free survival is defined as the period from the date of registration until (1) the  
961 date of death from any cause, (2) the date on which disease progression is confirmed by

962 periodic testing, or (3) the date on which exacerbation of clinical symptoms is documented,  
963 whichever comes first.  
964 Even in cases where protocol treatment is discontinued for reasons other than disease  
965 progression, imaging-based evaluation should be continued to check for disease  
966 progression. However, in subjects who have received post-treatment before disease  
967 progression is confirmed, the cut-off date will be defined as the day of post-treatment  
968 initiation.

969 For subjects in whom death or disease progression has not been confirmed at the time of  
970 analysis or in whom the date of the onset of these events is unknown, the most recent  
971 outpatient visit date or inpatient treatment date before loss to follow-up will be defined as  
972 the cut-off date.

973 Definition of disease progression:

974 Disease progression is defined as follows:  $\geq 20\%$  increase in one direction and 5-mm  
975 absolute increase in the size of a measurable lesion on regular CT compared with the size at  
976 the most shrunk state; unequivocal progression of a non-target lesion; appearance of a de  
977 novo lesion; and exacerbation of clinical symptoms.

978

### 979 **15.2 Overall survival**

980 Overall survival is defined as the period from the date of registration until death from any  
981 cause. For subjects who are alive at the time of analysis and those lost to follow-up, the last  
982 day on which they were confirmed to be alive should be handled as the cut-off date.

983

### 984 **15.3 Best overall response**

985 In determining tumor response, the best overall response will be evaluated only in subjects  
986 with a measurable lesion by using the Response Evaluation Criteria In Solid Tumor  
987 (RECIST) version 1.1 (translated into Japanese by the JCOG). A response duration of 4  
988 weeks or longer is not a requirement for complete response (CR) or partial response (PR)  
989 as the best overall response. However, stable disease (SD) as the best overall response  
990 requires that overall response be maintained at SD state from the time of registration until  
991 adjudication carried out at 6 weeks or later.

992

## 993 **16. Safety endpoints**

### 994 **16.1 Incidence of adverse events/reactions**

995 The incidence of adverse events/reactions by worst grade in each course will be  
996 investigated by using the Common Terminology Criteria for Adverse Events version 4.0  
997 (CTCAE v 4.0; translated into Japanese by the JCOG/JSCO). Adverse events will be  
998 graded according to the closest match to the definition given in grades 1 to 4. In this  
999 study, treatment-related death will be recorded as a grade 4 event, although the original  
1000 NCI-CTCAE specifies that this event should be classified into the grade 5 events.

1001 In the event of treatment-related death, the causal relationship between the adverse  
1002 event(s) observed and death will be investigated and subjected to adverse event  
1003 reporting, and the details will be described in the “circumstances at the time of death”  
1004 section of the treatment discontinuation form and the follow-up form. (A decision will  
1005 be made separately in a post-hoc review as to whether the event should be handled as a  
1006 grade 5 event.)  
1007

1008

### 1009 **16.2 Definition of adverse events**

1010 An adverse event is any undesirable unintended sign (including abnormalities in  
1011 clinical laboratory values), symptom, or disease observed during a treatment or  
1012 procedure, regardless of the causal relationship with the treatment or procedure. This  
1013 study will follow the grading system of the Common Terminology Criteria for Adverse  
Events version 4.0 (CTCAE v 4.0; translated into Japanese by the JCOG/JSCO).

1014  
1015  
1016  
1017  
1018  
1019  
1020  
1021  
1022  
1023  
1024  
1025  
1026  
1027  
1028  
1029  
1030  
1031  
1032  
1033  
1034  
1035  
1036  
1037  
1038  
1039  
1040  
1041  
1042  
1043  
1044  
1045  
1046  
1047  
1048  
1049  
1050  
1051  
1052  
1053  
1054  
1055  
1056  
1057  
1058  
1059  
1060  
1061  
1062  
1063  
1064

**16.3 Records of subjective and objective findings and laboratory tests during the study period**

- (1) Regarding the items described in the subjective and objective findings in Section 13.2(3), the grade and date of onset will be described in case report forms, regardless of whether they are adverse events or not.
- (2) Regarding the items described in the blood tests in Section 13.2(4) (except Ccr, HBs antigen, HBs antibody, HBc antibody, and HCV antibody), test values and date of testing will be recorded in case report forms, regardless of whether the findings constitute adverse events.
- (3) Regarding subjective and objective findings and blood tests not specified above, the event name, grade, and date of onset will be described in case report forms, only if there is a causal relationship with the study drug.

**17 Reporting of adverse events**

**17.1 Adverse events requiring expedited reporting**

Adverse events that fall under any of the following are subject to expedited reporting.

- (1) Any death occurring during the study period or within 30 days after the final dose. It may or may not be causally related to the study treatment. The death of a patient in whom study treatment has already been discontinued is still subject to expedited reporting as long as the event occurred within 30 days after the final dose. (In counting “30 days,” the final dosing day should be regarded as day 0.)
- (2) Death occurring on or after day 31 following the final dose whose causal relationship with the study treatment cannot be ruled out. This applies to deaths suspected of being treatment-related. Unequivocal cases of death from cancer will be excluded.
- (3) Unexpected grade 4 non-hematologic toxicity (adverse events not included in the Blood/Bone Marrow category in the CTCAE). Adverse events not listed in the package insert of each drug are applicable.

**17.2 Adverse events requiring non-expedited reporting**

Adverse events that fall under any of the following are subject to non-expedited reporting.

- (1) Unexpected grade 2-3 adverse events  
Grade 2-3 adverse events not listed in the package insert of the drug
  - (2) Irreversible and significant disorders  
Aplastic anemia, myelodysplastic syndrome, secondary cancer
  - (3) Other significant medical events
- Information that does not fall under any of the above but is judged to be important and should be shared by the principal investigator and study group members

**17.3 Responsibilities of the facility representative**

If an adverse event for mandatory reporting occurs, the facility representative should report it to the Study Coordinator in accordance with the following rules.

- 1) Expedited report

In the event of an adverse event subject to expedited reporting, the attending physician should promptly inform the facility representative. If the facility representative cannot be contacted, the attending physician should act on behalf of the facility representative.



- 1065 i. Primary report  
1066 The facility representative should complete the Adverse Event Form (expedited  
1067 primary reporting; timeframe: within 72 hours), send a fax or email to the Study  
1068 Coordinator, and inform the Study Coordinator by phone within 72 hours after  
1069 becoming aware of the occurrence of an adverse event of concern.  
1070  
1071 ii. Secondary report  
1072 The facility representative should complete the Adverse Event Form and  
1073 separately prepare a case report (A4 size; no particular format specified) containing  
1074 more detailed information. Both of these should be mailed, faxed, or emailed to the  
1075 Study Coordinator within 7 days after the facility representative becomes aware of  
1076 the adverse event of concern. Submission of a report with some incomplete  
1077 sections is acceptable at this stage since prompt communication of information  
1078 should be given priority.  
1079  
1080 iii. Tertiary report  
1081 The facility representative should complete all blanks in the Adverse Event Form  
1082 and mail, fax, or email the completed Adverse Event Form to the Study  
1083 Coordinator within 15 days after becoming aware of the adverse event of concern.  
1084 An autopsy report should also be submitted if autopsy has been performed. (An  
1085 autopsy report may be submitted at a later date.)  
1086  
1087 2) Non-expedited report  
1088 The facility representative should complete the Adverse Event Form and mail, fax,  
1089 or email it to the Study Coordinator within 15 days after becoming aware of the  
1090 occurrence of the adverse event of concern.  
1091

#### 1092 **17.4 Responsibilities of the Study Coordinator**

1093 After confirming the reliability of the expedited report, the Study Coordinator should  
1094 immediately report to the Chairperson of the Data and Safety Monitoring Board. At the  
1095 same time, depending on the urgency and seriousness of the report, expedited reporting  
1096 should be made known to the participating sites. If it is judged that the report is urgent  
1097 and serious and that it is dangerous to continue the study, the Study Coordinator should  
1098 direct the WJOG Data Center to suspend registration. If instructed by the Data and Safety  
1099 Monitoring Board, the Study Coordinator will collect additional information and  
1100 disseminate such information to study sites, and order the suspension or continued  
1101 suspension of registration. Participating sites may be contacted by phone depending on  
1102 the degree of urgency; however, such phone communication should be followed by a  
1103 notice in writing (fax, mail, or email) as soon as possible.  
1104

#### 1105 **17.5 Responsibilities of the Data and Safety Monitoring Board**

1106 The Data and Safety Monitoring Board will assess the progress of the study, safety data,  
1107 and the efficacy of study treatment. It will also make recommendations to the Study  
1108 Coordinator to continue, modify, or discontinue the study. The Board will review the  
1109 Study Coordinator's views on reportable adverse events and the appropriateness of  
1110 response to adverse events. Where necessary, the Board will recommend study  
1111 discontinuation or protocol revision, and will also take charge of reviewing and  
1112 approving proposed revisions. The Study Coordinator will be informed by the Board in  
1113 writing of future actions, including handling of cases and whether to continue the study.  
1114

#### 1115 **17.6 Reporting obligation based on the Ethical Guidelines for Medical Research**

1116  
1117  
1118  
1119  
1120  
1121  
1122  
1123  
1124  
1125  
1126  
1127  
1128  
1129  
1130  
1131  
1132  
1133  
1134  
1135  
1136  
1137  
1138  
1139  
1140  
1141  
1142  
1143  
1144  
1145  
1146  
1147  
1148  
1149  
1150  
1151  
1152  
1153  
1154  
1155  
1156  
1157  
1158  
1159  
1160  
1161  
1162  
1163  
1164  
1165  
1166

## **Involving Human Subjects**

- 1) Reporting to the head of the study site  
Adverse events subject to expedited reporting under the provisions of “17.1 Adverse events requiring expedited reporting” will be handled as “serious adverse events” in the Ethical Guidelines for Medical Research Involving Human Subjects. If these adverse events occur, the principal investigator of the study site should immediately report to the head of the study site in accordance with the regulations of the site.
- 2) Reporting to the Minister of Health, Labour and Welfare  
Among the adverse events that are subject to expedited reporting under the provisions of “17.1 Adverse events requiring expedited reporting,” unexpected adverse events for which a causal relationship with protocol treatment cannot be ruled out should be reported to the Minister of Health, Labour and Welfare through the head of the study site where the adverse event of concern occurred in accordance with the Ethical Guidelines for Medical Research Involving Human Subjects.

## **18 Case report forms**

- (1) The treating physician or clinical research coordinator (CRC) should complete the case report form without delay and submit it to the Data Center
- (2) Submission due date
  - Pre-treatment report form: Within 28 days after registration
  - Course-specific report: Within 28 days after completion of each course
  - Completion/discontinuation report form: Within 28 days after completion/discontinuation
  - 6- (12-, 18-, or 24-) month investigation form: Within 28 days after the investigation has been conducted
  - Follow-up form: Within 21 days after the request
- (3) If any deviation from or non-compliance with the study protocol is found, the details and future actions should be described in the Remarks column of the relevant case report forms.

## **19 Monitoring and auditing**

### **19.1 Monitoring**

The Study Coordinator will monitor the progress of the study and review collected case reports to confirm the protocol compliance status of the participating sites. The occurrence of adverse events will be confirmed by means of expedited reports and non-expedited reports. If the number of mortality cases for which a causal relationship with the study treatment cannot be ruled out reaches 3, advice from the Data and Safety Monitoring Board will be sought on whether to continue the study.

### **19.2 Necessary measures**

If, as a result of monitoring, the study implementation status of a participating site is judged to be inappropriate, the Study Coordinator will request the site to take appropriate measures to improve the situation.

## **20 Statistical considerations**

### **20.1 Number of cases and the rationale therefor**

The threshold 1-year survival rate in this study has been set at 40% based on the fact that the median survival of patients treated with chemotherapy was 6 to 10 months in previous clinical studies of carcinoma of unknown primary site. Assuming that the new treatment strategy in this study will yield a similar outcome to that expected in

1167 previous studies in which DNA chips were used to infer the primary site, the expected  
 1168 1-year survival rate in this study has been set at 50%. With a  $\beta$  error of 0.2 and an  $\alpha$   
 1169 error of 0.05, a total of 102 cases would be necessary, assuming that the registration  
 1170 period is 2 years and the follow-up period is 1 year. Allowing for deviation cases, the  
 1171 number of cases has been set at 110.

1172  
 1173 **20.2 Analysis population**

1174 The patient populations subject to statistical analysis are shown in the figure below. In  
 1175 principle, the classification of subjects is determined according to the following criteria.  
 1176 Efficacy analysis will be performed primarily in the full analysis set. Safety analysis  
 1177 will be performed primarily in the safety analysis set.  
 1178

|                         |                                                                                                                                                                                                                                                                                                                                       |
|-------------------------|---------------------------------------------------------------------------------------------------------------------------------------------------------------------------------------------------------------------------------------------------------------------------------------------------------------------------------------|
| Registered cases        | All subjects who have been registered by the Data Center after confirmation that they meet all inclusion criteria and do not fall under any of the exclusion criteria.                                                                                                                                                                |
| Safety analysis set     | Among all registered subjects, those who received at least one dose of the study drug.                                                                                                                                                                                                                                                |
| Full analysis set (FAS) | Population obtained by excluding the following subjects from the safety analysis set: <ul style="list-style-type: none"> <li>● Subjects who have been found to be ineligible after enrollment</li> <li>● Subjects in whom efficacy has not been evaluated at all after administration</li> </ul>                                      |
| Per protocol set (PPS)  | Population obtained by excluding the following subjects from the FAS: <ul style="list-style-type: none"> <li>● Subjects in whom a significant protocol violation has been noted that may affect efficacy evaluation</li> <li>● Subjects in whom adequate efficacy evaluation is impossible due to insufficient observation</li> </ul> |

1179

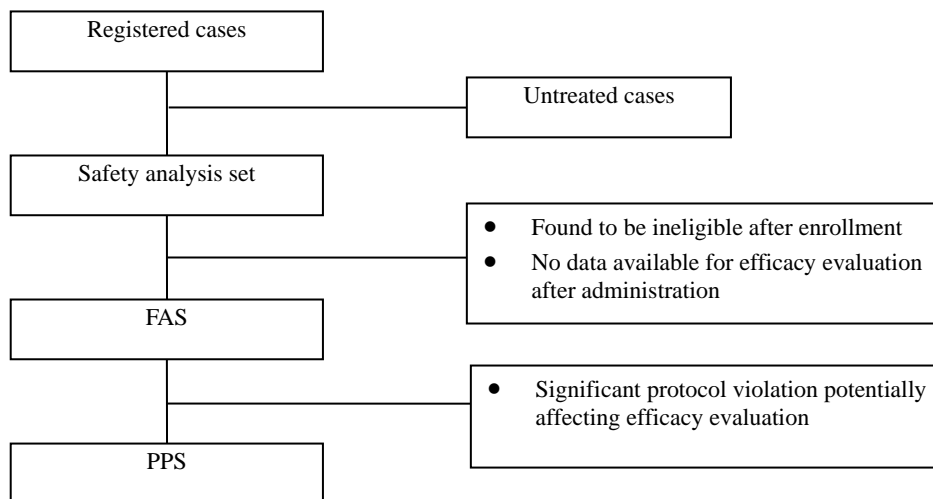

1180  
 1181  
 1182  
 1183  
 1184  
 1185  
 1186

**20.3 Final analysis**

All endpoints will be subject to analysis 1 year after registration of the last subject. The details of the analysis will be provided separately in the final analysis plan. The analysis results will be compiled by the Data Center in the form of a final analysis

1187 report and submitted to the Study Coordinator. The results will be presented in  
1188 accordance with the rules of our study group.  
1189

## 1190 **21 Costs associated with the clinical study and compensation**

1191 This study will be conducted within the scope of usual health insurance coverage, and  
1192 medications, tests during the study period will be covered by the subject's health insurance.  
1193

## 1194 **22 Responsibilities for addressing health damage to subjects**

1195 In the event that any health damage occurs in subjects as a result of the conduct of this  
1196 study, the (sub)investigator and study site should take necessary measures such as medical  
1197 treatment.  
1198

## 1199 **23 Approval and modification of the protocol**

1200 This protocol and written information for patients should be approved by the institutional  
1201 review board of participating sites. If modification of an important part of the protocol  
1202 becomes necessary after the start of the study, the Study Coordinator will report to the team  
1203 members, discuss the matter, and carry out modifications. This does not apply to minor  
1204 changes, however. Modifications of matters described in appendices such as changes in  
1205 participating sites will not be handled as a revision of the protocol.  
1206

## 1207 **24 Discontinuation or suspension of the entire study**

1208 Discontinuation or suspension of the entire study may be considered in the following  
1209 instances.

- 1210 1. The Data and Safety Monitoring Board has made a recommendation to discontinue the  
1211 study, and it has been determined that the continuation of the study is impossible as a  
1212 result of deliberations at the member meeting.
- 1213 2. There is nothing for it but to discontinue the study for certain reasons.  
1214

## 1215 **25 Publication of study results**

1216 After the end of the study, the results of the study will be promptly compiled and  
1217 published in appropriate academic conferences and English journals in Japan and  
1218 overseas.  
1219

## 1220 **26. Method for inferring the primary site by using NGS**

### 1221 **26.1 Type and amount of samples**

1222 Biopsy samples:

1223 Tumor tissue of metastatic lesions (including lymph nodes) will be collected by  
1224 endoscopic biopsy, and percutaneous needle biopsy. Coelomic fluid samples such as  
1225 pleural fluid and ascitic fluid are not acceptable because of quality problems.  
1226

### 1227 **26.2 Methods and procedures**

#### 1228 **26.2.1 Timing and method of collection**

1229 In principle, samples obtained at the time of diagnosis will be used. However, if it is  
1230 impossible to collect a sufficient amount of samples for analysis at the time of diagnosis  
1231 or if the samples obtained are not suitable for analysis, samples may be collected once  
1232 again for analysis specifically, provided that the patient's consent is obtained and the  
1233 patient safety is ensured. Samples will be collected by endoscopic biopsy and  
1234 percutaneous needle biopsy.

#### 1235 **26.2.2 Shipment of samples**

1236 ➤ For biopsy samples subject to analysis, at least 10 (preferably 20)  
1237 paraffin-embedded sections (FFPE sections, approximately 4 to 5 μm thick) with

1238 tumors confirmed by a pathologist should be sent by courier (at room temperature).  
1239 Even in cases where 10 or more sections cannot be prepared, efforts should be made to  
1240 submit as many sections as possible. It is desirable to submit sections mostly made up  
1241 tumors.  
1242 ➤ Samples should be labeled with the case registration number.  
1243 ➤ A report from the pathologist should be attached, and a photomicrograph of  
1244 hematoxylin-eosin stained specimens should also be appended whenever possible.  
1245 Personal information (name, date of birth) included in the report should be masked so  
1246 that it is not disclosed to the outside.  
1247 ➤ The Nakagawa Group will bear the costs of shipment (including newly purchased  
1248 slide cases). (Original receipts should be obtained for these expenses.)  
1249 ➤ Shipment should be arranged in a way that samples are delivered between 9 a.m.  
1250 and 5 p.m. on weekdays (not on Saturday, Sunday, or national holidays).

1251

1252 Delivery address

1253 Tissue biopsy samples should be sent to:  
1254 Kazuto Nishio, Department of Genome Biology, Kindai University Faculty of  
1255 Medicine  
1256 knishio@med.kindai.ac.jp  
1257 377-2, Ohno-higashi, Osakasayama, Osaka 589-8511  
1258 Tel.: 072-366-0221, ext.: 3150  
1259 Fax: 072-367-6369

1260

### 1261 **26.2.3 Method for inferring the primary site**

1262 Delivered samples will be subjected to DNA and RNA extraction and analyzed for  
1263 gene mutation, amplification, and expression at the Department of Genome Biology,  
1264 Kindai University Faculty of Medicine. The flow chart below will be followed in  
1265 inferring the primary site.

1266 A. The primary site will be inferred based on gene expression data obtained from  
1267 extracted RNA. This process involves an algorithm that applies the actual analysis results  
1268 from the Randomized Phase II Study Comparing Chemotherapy Led by Using the  
1269 Classification of Primary Tumor Origin with Empirical Chemotherapy for Patients with  
1270 Unknown Primary Cancer, which we previously conducted using the cancer classification  
1271 algorithm constructed by using Gene Expression Omnibus, a public database, and  
1272 learning data at the Department of Genome Biology, Kindai University. This previously  
1273 used algorithm is constructed from an analysis of 22,215 probe sets commonly measured  
1274 in 2,280 organ-specific carcinomas with a diagnosis of primary site, and cross-validation  
1275 has confirmed that appropriate cancer classification is enabled by reduction of variables  
1276 and selection of cancer type. The reduction of variables is implemented in two stages. In  
1277 the first stage, the average of the highly correlated probe sets is obtained and variables are  
1278 reduced to about 1,000. In the second stage, they are reduced to some 10 variables by the  
1279 partial least square method. Cancer type selection is based on reduced variables, and  
1280 classification is done according to the closest expression profile. However, classification  
1281 is impossible if the information entropy of the sample is higher than a certain level. In the  
1282 analysis of more than 120 patients in an actual clinical study, there were several genes  
1283 that were poorly expressed and could not be used for inference of primary sites. It was  
1284 therefore considered essential to narrow down the gene candidates in view of future  
1285 applications to clinical practice, as well as for the sake of convenience. Accordingly, an  
1286 algorithm in which the candidates were narrowed down to about 150 genes was  
1287 constructed anew wherein the weighted voting method is used for score calculation.  
1288 Different algorithms are applied depending on the sex. Verification using the database has  
1289 shown that almost equivalent results to the old algorithm can be obtained.

1290 B. Cancer-specific gene mutations and gene amplifications that have a significant  
1291 impact on treatment strategies will be explored based on DNA analysis. Specifically,  
1292 active EGFR mutation in lung adenocarcinoma, active c-KIT mutation in sarcoma (GIST),  
1293 HER2 gene amplification in breast cancer and gastric cancer, and RAS mutation in  
1294 colorectal cancer will be investigated. If a cancer-specific gene mutation or amplification  
1295 is present that is relevant to treatment, the probability of each cancer as calculated by  
1296 Bayes' inference is multiplied by the cancer inference score in the algorithm mentioned in  
1297 A above, and the one with the highest score is adopted as the inferred type of cancer.  
1298 Gene information will be communicated to the treating physician if it is associated with  
1299 the cancer type identified as a result of inference (EGFR mutation for lung  
1300 adenocarcinoma, c-KIT mutation for sarcoma, and HER2 gene amplification for breast  
1301 cancer or gastric cancer). If these gene mutations and amplifications are present, it can be  
1302 presumed that patients with lung cancer are EGFR mutation-positive, patients with  
1303 sarcoma have c-KIT mutation-positive gastrointestinal stromal tumors, and patients with  
1304 breast cancer or gastric cancer are HER2-positive, and medical care on health insurance  
1305 may be provided on such assumptions (treatment with gefitinib, erlotinib, or afatinib for  
1306 lung cancer; treatment with imatinib or sunitinib for sarcoma; and HER2 therapy with  
1307 trastuzumab for breast cancer or gastric cancer). RAS gene mutations in colorectal cancer  
1308 will be used for the decision as to whether to use an anti-EGFR antibody.  
1309

1310 The WJOG Data Center will be informed of the primary site inference results thus  
1311 obtained within about 7 business days (not including Saturdays and Sundays), and the site  
1312 in charge of the subject of concern will be also notified immediately.  
1313

1314

### 1315 **26.3 Sample storage location and period**

1316 Samples will be stored at a laboratory within the Department of Genome Biology, Kindai  
1317 University Faculty of Medicine. Kazuto Nishio of the Department of Genome Biology,  
1318 Kindai University Faculty of Medicine will assume responsibility for the storage of  
1319 samples. DNA and RNA will be stored in a -80°C deep freezer. Paraffin slides of surgical  
1320 samples will be stored in the same laboratory within the Department of Genomic Biology,  
1321 Kindai University Faculty of Medicine. Samples will be stored until the end of the period  
1322 of five years from the date on which the end of the study is announced or until the end of  
1323 three years from the date on which the final report of the study results is published,  
1324 whichever comes later. Samples for which the storage period has expired are discarded  
1325 unless there is a particular reason. The security of the storage area will be ensured with  
1326 two or three protective measures, namely access control at the entrance to the lab  
1327 building, a locked lab door, and a key-controlled deep freezer.  
1328

1329

### 1329 **26.4 Disposal of samples**

1330 Samples will be disposed of if the consent of the contributing patient is withdrawn, if the  
1331 anonymized number becomes invalid due to a flaw in labeling or computer glitch, if  
1332 there is a documented/suspected mix-up or contamination of the sample, or if the  
1333 investigator recognizes the necessity of disposal. In such cases, the anonymized number  
1334 should be removed before disposal. If a contributing patient withdraws his/her consent  
1335 and applicable samples are stored at a study site, the person in charge at the study site  
1336 will be informed of the consent withdrawal and should dispose of the samples. If the  
1337 applicable samples are stored at Kindai University, the Study Coordinator will be  
1338 contacted for disposal. Samples for which the storage period has expired (five years from  
1339 the date on which the end of the study is announced or three years from the date on  
1340 which the final report of the study results is published, whichever is later) will be

1341 disposed of, unless there is a particular reason for further storage.

#### 1342 1343 **26.5 Use of surplus samples**

1344 If consent is obtained, surplus samples will be stored as valuable research resources and  
1345 made available for research purposes. However, the use of surplus samples in a way not  
1346 specified in this protocol should be limited to cancer research only, and it is also essential  
1347 that the study protocol be approved by our study group as well as the institutional review  
1348 board of the facility providing the samples. No germline genetic analysis will be  
1349 performed. Surplus samples will be stored at a laboratory within the Department of  
1350 Genome Biology, Kindai University Faculty of Medicine until the end of the period of  
1351 five years from the date on which the end of the study is announced or until the end of  
1352 three years from the date on which the final report of the study results is published,  
1353 whichever comes later. Surplus samples for which the storage period has expired are  
1354 discarded unless there is a particular reason for further storage.

#### 1355 1356 **26.6 Analytical techniques that may be employed in the future**

1357 NGS, microarrays, RT-PCR, immunostaining, and ELISA. Any of these can be used for  
1358 the analysis of cancer cells and the detection of somatic mutations or acquired genomic  
1359 aberrations. It should be noted that the “structure or function of the human genome and  
1360 genes that can be inherited by offspring” will not be subject to analysis. However,  
1361 analysis of normal tissue to identify mutations will be allowed since it is not within the  
1362 scope of the Ethical Guidelines for Human Genome/Gene Analysis Research. On the  
1363 other hand, analysis of normal tissue for the “structure or function of the human genome  
1364 and genes that can be inherited by offspring,” such as SNP analysis, will not be allowed.  
1365 Review and approval by the participating site and Nakagawa Group are required  
1366 whenever samples collected in this study are to be used.

#### 1367 1368 **26.7 Anticipated results and attendant risks**

1369 This study will increase the likelihood that patients with carcinoma of hitherto unknown  
1370 primary site can receive more effective treatment by adding another tool to infer the  
1371 primary lesion, and this not only greatly contributes to the improved treatment of  
1372 carcinoma of unknown primary site but also potentially helps clarify the characteristics  
1373 of this condition. However, it is highly likely that new tissue samples will be collected  
1374 for this study specifically, and there is a potential risk that physical hazards and  
1375 disadvantages may arise out of new sample collection. It is conceivable that the risks and  
1376 disadvantages related to the human rights and privacy of patients are extremely small for  
1377 the following reasons: (1) the study will be conducted in accordance with this study  
1378 protocol and subjects will be fully informed of the study content and give their consent;  
1379 (2) personal information will be anonymized and strictly controlled; (3) the “structure or  
1380 function of the human genome and genes that can be inherited by offspring” will be  
1381 outside the scope of this study; and (4) the genomes of normal tissues will not be  
1382 analyzed except as controls.

#### 1383 1384 **26.8 Method of protecting personal information**

1385 Personal information is anonymized and strictly controlled by the WJOG Data Center.  
1386 Genetic information linked to personal information will not be provided to the analysis  
1387 facility or any third party.

#### 1388 1389 **26.9 Disclosure of genetic information**

1390 The disclosure of genetic information will be handled as follows. The result of genetic  
1391 analysis in each patient will not be disclosed without a request for disclosure from the

1392 patient. The reason for this is that whether the newly identified evidence from the  
1393 samples stored in this study has clinical significance is unclear unless correlation  
1394 analysis with clinical information is carried out. Moreover, such significance depends in  
1395 a large part on future research, such as evaluation in follow-up studies. Nonetheless, if a  
1396 patient requests disclosure of genetic analysis results despite being informed of the above,  
1397 only his/her data will be disclosed. In such cases, the attending physician should contact  
1398 the Study Coordinator by phone or email.  
1399

## 1400 **26.1 Genetic counseling**

1401 This study does not fall under the scope of research on single-gene disorders and does  
1402 not involve the “structure or function of the human genome and genes that can be  
1403 inherited by offspring.” Therefore, gene counselling is not applicable.  
1404

### 1405 **26.11 Definition of terms**

1406 The definition of terms in this study protocol is congruent with that in the Ethical  
1407 Guidelines for Human Genome/Gene Analysis Research, which was established through  
1408 joint efforts by the Ministry of Education, Culture, Sports, Science and Technology, the  
1409 Ministry of Health, Labour and Welfare, and the Ministry of Economy, Trade and Industry.  
1410

#### 1411 **Samples:**

1412 Parts of human body such as blood, tissues, cells, body fluids, and excrement, as well as  
1413 human DNA extracted therefrom, that are intended to be used in human genome/gene  
1414 analysis research, information of medical treatment in contributing patients, and other  
1415 information used in the research.  
1416

#### 1417 **Human genome/gene analysis research:**

1418 A type of research that attempts to clarify the structure or function of the human genome  
1419 and genes that are commonly present in the cells making up individual donors and can be  
1420 inherited by their offspring by using samples This includes cases where only samples used  
1421 in this study are provided. (Detailed rules) In principle, these guidelines do not apply to  
1422 research targeting genomic or genetic mutations that arise after birth only in lesions in  
1423 diseases such as cancer and are not inherited by offspring (i.e., research analyzing somatic  
1424 mutations, including analysis of normal tissue to identify mutations), research on gene  
1425 expression, and research on the structure or function of protein.  
1426

#### 1427 **Anonymization:**

1428 Removal of identifying information so that the original source cannot be known. Donors  
1429 can be identified when necessary through a correspondence table between the donors and  
1430 newly assigned codes or numbers.  
1431

## 1432 **27. Study organization**

1433 This study will be conducted as a group study of the Nakagawa Group. The study results will be  
1434 shared and published regardless of the results.  
1435

### 1436 **Study Chair**

1437 **Group Chair** Kazuhiko Nakagawa

1438 Department of Medical Oncology, Faculty of Medicine, Kindai University  
1439

### 1440 **Study Coordinator**

1441 Hidetoshi Hayashi

1442 Department of Medical Oncology, Faculty of Medicine, Kindai University



1443 377-2 Ohno-higashi Sasayama-shi Osaka, Japan, 589-8511

1444 Tel: +81-72-366-0221 Fax: +81-72-360-5000

1445 E-mail: hidet31@gmail.com

1446

1447 **Registration Office**

1448 WJOG Data Center

1449 304 Nanba Plaza Buiding 3F. 1-5-7 Motomachi Naniwaku Osaka-shi, Osaka 556-0016

1450 Tel:+81-6-6633-7400 Fax:+81-6-6633-7405

1451 E-mail : datacenter@wjog.

1452

1453

1454 Person in charge of sample storage and analysis: Kazuto Nishio, Department of Genome  
1455 Biology, Kindai University Faculty of Medicine

1456

1457 Statistical analysis manager: Yasutaka Chiba, Clinical Research Center, Kindai University  
1458 Hospital

1459

1460

1461 Data and Safety Monitoring Board Chairperson

1462 Tetsuya Mitsudomi, Department of Thoracic Surgery, Kindai University Faculty of Medicine

1463

1464 Data and Safety Monitoring Board Member

1465 Taro Sato, Department of Frontier Science for Cancer and Chemotherapy, Osaka University  
1466 Graduate School of Medicine

1467

1468 Data and Safety Monitoring Board Member

1469 Naruo Yoshimura, Department of Respiratory Medicine, Osaka City University Faculty of  
1470 Medicine

1471

1472

1473

1474 **28. Administrative expenses for the study**

1475 The administrative expenses for this study will be covered by consigned research expenses of  
1476 the Japan Agency for Medical Research and Development (Practical Research Project for  
1477 Innovative Cancer Medicine) for fiscal 2016.

1478

1479

1480  
1481  
1482  
1483  
1484  
1485  
1486  
1487  
1488  
1489  
1490  
1491  
1492  
1493  
1494  
1495  
1496  
1497  
1498  
1499  
1500  
1501  
1502  
1503  
1504  
1505  
1506  
1507  
1508  
1509  
1510  
1511  
1512  
1513  
1514

## References

1. Woods RL, Fox RM, Tattersall MH, et al: Metastatic adenocarcinoma of unknown primary site: a randomized study of two combination-chemotherapy regimens. *N Engl J Med* 303: 87-89, 1980.
2. Goldberg RM, Smith FP, Ueno W, et al: 5-fluorouracil, ADMiamycin, and mitomycin in the treatment of adenocarcinoma of unknown primary. *J Clin Oncol* 4: 395-399, 1986.
3. Hainsworth JD, Erland JB, Kalman CA, et al: Carcinoma of unknown primary site: Treatment with one-hour paclitaxel, carboplatin and extended schedule etoposide. *J Clin Oncol* 15: 2385-2393, 1997.
4. Greco FA, Erland JB, Morrissey LH, et al: Phase II trials with docetaxel plus cisplatin or carboplatin in carcinoma of unknown primary site. *Ann Oncol* 11: 211-215, 2000.
5. Greco FA, Burris III HA, Litchy S, et al: Gemcitabine, carboplatin, and paclitaxel for patients with carcinoma of unknown primary site: A Minnie Pearl Cancer Research Network Study. *J Clin Oncol* 20: 1651-1656, 2002.
6. Culine S, Lortholary A, Voigt J-J, et al: Cisplatin in combination with either gemcitabine or irinotecan in carcinomas of unknown primary site: Results of a randomized phase II study-trial for the French Study Group on Carcinomas of Unknown Primary (GEFCAPI 01). *J Clin Oncol* 21: 3479-3482, 2003.
7. Briasoulis E, Kalofonos H, Bafaloukos D, et al: Carboplatin plus paclitaxel in unknown primary carcinoma: a phase II Hellenic Cooperative Oncology Group study. *J Clin Oncol* 18: 3101-3107, 2000.
8. Bloom G, Yang IV, Boulware D, et al: Multiplatform, multi-site, microarray-based human tumor classification. *Am J Pathol* 164: 9-16, 2004.
9. Ramaswamy S, Tamayo P, Rifkin R, et al: Multiclass cancer diagnosis using tumor gene expression signatures. *Proc Natl Acad Sci USA* 98: 15149-15154, 2001.
10. Su AI, Welsh JB, Sapinoso LM, et al: Molecular classification of human carcinomas by use of gene expression signatures. *Cancer Res* 61: 7388-7393, 2001.
11. Ma X-J, Patel R, Wang X, et al: Molecular classification of human cancers using a 92-gene real-time quantitative polymerase chain reaction assay. *Arch Pathol Lab Med* 130: 465-473, 2006.
12. Tothill RW, Kowalczyk A, Rischin D, et al: An expression-based site of origin diagnostic method designed for clinical application to cancer of unknown origin. *Cancer Res* 65: 4031-4040, 2005.
13. Varadhachary GR, Talantov D, Raber MN, et al: Molecular profiling of carcinoma of unknown primary and correlation with clinical evaluation. *J Clin Oncol* 26: 4442-4448, 2008.
